# Supplementary material
Source: MDPI journal article supplement (https://www.mdpi.com/1424-2818/12/4/142)
Supplement: s1 [file s1]

|              |                 |                     | Referen                 |
|--------------|-----------------|---------------------|-------------------------|
|              |                 |                     | Location on I           |
|              |                 |                     | Range (La               |
|              |                 |                     | Range (Loi              |
|              |                 |                     | Depth inte              |
|              |                 |                     | Assembla                |
|              |                 |                     | Samples nu              |
|              |                 |                     | Size fract              |
| Sub-environ  |                 |                     |                         |
| Order        | Superfamily     | Family              | Genus                   |
| Lituolida    | Lituoloidea     | Lituolidae          | <i>Ammobaculites</i>    |
|              |                 |                     | <i>Ammomarginulina</i>  |
|              |                 |                     | <i>Ammotium</i>         |
|              | Verneuilinoidea | Prolixoplectidae    | <i>Eggerelloides</i>    |
|              |                 | Verneuilinidae      | <i>Gaudryina</i>        |
|              | Trochamminoidea | Trochamminidae      | <i>Trochammina</i>      |
|              |                 |                     | <i>Portatrochammina</i> |
|              |                 | <i>Rotaliammina</i> |                         |
| Textulariida | Textularioidea  | Textulariidae       | <i>Sahulia</i>          |
|              |                 |                     | <i>Textularia</i>       |

|           |                |                  |                           |
|-----------|----------------|------------------|---------------------------|
|           |                |                  |                           |
|           |                |                  | <i>Siphotextularia</i>    |
|           |                |                  | <i>Bigenerina</i>         |
|           |                | Oligidae         | <i>Olgita</i>             |
|           | Eggerelloidea  | Valvulinidae     | <i>Clavulina</i>          |
|           | Hormosinoidea  | Reophacidae      | <i>Reophax</i>            |
| Miliolida | Cornuspiroidea | Cornuspiridae    | <i>Cornuspira</i>         |
|           | Milioloidea    | Cribrulinoididae | <i>Adelosina</i>          |
|           |                |                  |                           |
|           |                | Hauerinidae      | <i>Flintinoides</i>       |
|           |                |                  | <i>Hauerina</i>           |
|           |                |                  | <i>Sigmoihauerina</i>     |
|           |                |                  | <i>Spirosigmoilina</i>    |
|           |                |                  | <i>Cycloforina</i>        |
|           |                |                  |                           |
|           |                |                  | <i>Miliolinella</i>       |
|           |                |                  |                           |
|           |                |                  | <i>Cribromiliolinella</i> |
|           |                |                  | <i>Miliolina</i>          |
|           |                |                  | <i>Lachlanella</i>        |

|  |  |  |  |                          |
|--|--|--|--|--------------------------|
|  |  |  |  |                          |
|  |  |  |  | <i>Pseudolachlanella</i> |
|  |  |  |  | <i>Massilina</i>         |
|  |  |  |  |                          |
|  |  |  |  | <i>Pseudomassilina</i>   |
|  |  |  |  |                          |
|  |  |  |  | <i>Pseudotriloculina</i> |
|  |  |  |  |                          |
|  |  |  |  | <i>Siniloculina</i>      |
|  |  |  |  | <i>Ptychomiliola</i>     |
|  |  |  |  |                          |
|  |  |  |  | <i>Pseudopyrgo</i>       |
|  |  |  |  | <i>Pyrgo</i>             |
|  |  |  |  |                          |
|  |  |  |  | <i>Pyrgoella</i>         |
|  |  |  |  | <i>Proemassilina</i>     |
|  |  |  |  | <i>Quinqueloculina</i>   |
|  |  |  |  |                          |

|                    |
|--------------------|
| <i>Parrina</i>     |
| <i>Affinetrina</i> |
| <i>Triloculina</i> |

|  |                  |  |                          |
|--|------------------|--|--------------------------|
|  |                  |  |                          |
|  |                  |  | <i>Triloculinella</i>    |
|  |                  |  | <i>Biloculinella</i>     |
|  |                  |  | <i>Varidentella</i>      |
|  |                  |  | <i>Mesosigmoilina</i>    |
|  |                  |  | <i>Sigmoilina</i>        |
|  |                  |  | <i>Sigmoilopsis</i>      |
|  |                  |  | <i>Sigmoilinella</i>     |
|  |                  |  | <i>Siphonaperta</i>      |
|  |                  |  | <i>Articulina</i>        |
|  |                  |  | <i>Ishamella</i>         |
|  |                  |  | <i>Steigerina</i>        |
|  |                  |  | <i>Sigmamiliolinella</i> |
|  | Spiroloculinidae |  | <i>Spiroloculina</i>     |

|              |                 |                 |                          |
|--------------|-----------------|-----------------|--------------------------|
|              |                 |                 |                          |
|              | Miliolacea      | Riveroinidae    | <i>Pseudohauerinella</i> |
|              | Nubecularioidea | Fischerinidae   | <i>Vertebralina</i>      |
|              |                 |                 | <i>Wiesnerella</i>       |
|              |                 | Ophthalmidiidae | <i>Ophthalmidium</i>     |
|              |                 |                 | <i>Edentostomina</i>     |
|              |                 |                 | <i>Spirophthalmidium</i> |
|              |                 | Nubeculariidae  | <i>Nodophthalmidium</i>  |
|              |                 |                 | <i>Nubecularia</i>       |
|              |                 |                 | <i>Nodobacularia</i>     |
|              | Soritoidea      | Peneroplidae    | <i>Peneroplis</i>        |
|              |                 |                 | <i>Coscinospira</i>      |
|              |                 |                 | <i>Spirolina</i>         |
|              |                 |                 | <i>Dendritina</i>        |
|              |                 | Soritidae       | <i>Sorites</i>           |
|              |                 | Miliamminidae   | <i>Miliammina</i>        |
|              |                 | Squamulinoidea  | <i>Squamulina</i>        |
| Spirillinida |                 | Spirillinidae   | <i>Spirillina</i>        |
|              |                 | Patellinidae    | <i>Patellina</i>         |
| Lagenida     | Nodosarioidea   | Lagenidae       | <i>Lagena</i>            |
|              |                 |                 | <i>Procerolagena</i>     |
|              |                 |                 | <i>Hyalinonetrion</i>    |

|              |                   |                     |                        |
|--------------|-------------------|---------------------|------------------------|
|              |                   | Nodosariidae        | <i>Reussoolina</i>     |
|              |                   |                     | <i>Pyramidulina</i>    |
|              |                   |                     | <i>Dentalina</i>       |
|              |                   |                     | <i>Nodosaria</i>       |
|              |                   |                     | <i>Laevidentalina</i>  |
| Vaginulinida |                   | Vaginulinidae       | <i>Lenticulina</i>     |
| Robertinida  | Robertinoidea     | Robertinidae        | <i>Pseudobulimina</i>  |
| Rotaliida    | Buliminoidea      | Buliminidae         | <i>Bulimina</i>        |
|              |                   | Reussellidae        | <i>Reussella</i>       |
|              |                   |                     | <i>Fijiella</i>        |
|              |                   | Trimosinidae        | <i>Quirimbatina</i>    |
|              |                   |                     | <i>Trimosina</i>       |
|              | Cassidulinoidea   | Bolivinitidae       | <i>Parabrizalina</i>   |
|              |                   |                     | <i>Sagrinella</i>      |
|              |                   |                     | <i>Neocassidulina</i>  |
|              |                   |                     | <i>Euloxostomum</i>    |
|              |                   |                     | <i>Loxostomina</i>     |
|              |                   |                     | <i>Pseudobrizalina</i> |
|              |                   |                     | <i>Bolivinellina</i>   |
|              |                   | Siphogenerinoididae | <i>Rectobolivina</i>   |
|              |                   | Tortoplectellidae   | <i>Tortoplectella</i>  |
|              | Chilostomelloidea | Trichohyalidae      | <i>Buccella</i>        |
|              |                   | Anomalinidae        | <i>Riminopsis</i>      |
|              | Fursenkoinoidea   | Fursenkoinidae      | <i>Fursenkoina</i>     |
|              | Turrilinoidea     | Turrilinidae        | <i>Floresina</i>       |
|              |                   | Stainforthiidae     | <i>Hopkinsina</i>      |
|              |                   |                     | <i>Stainforthia</i>    |
|              | Bolivinoidea      | Bolivinidae         | <i>Bolivina</i>        |
|              | Discorboidea      | Rosalinidae         | <i>Rosalina</i>        |
|              |                   |                     | <i>Neoconorbina</i>    |

|                   |                   |                        |
|-------------------|-------------------|------------------------|
|                   |                   |                        |
|                   |                   | <i>Gavelinopsis</i>    |
|                   | Eponididae        | <i>Eponides</i>        |
|                   |                   | <i>Poroeponides</i>    |
|                   | Cancrisidae       | <i>Cancris</i>         |
|                   |                   | <i>Valvulineria</i>    |
|                   | Discorbidae       | <i>Discorbis</i>       |
|                   | Heleninidae       | <i>Helenina</i>        |
| Discorbinelloidea | Discorbinellidae  | <i>Discorbinella</i>   |
|                   |                   | <i>Hanzawaia</i>       |
|                   | Pseudoparrellidae | <i>Facetocochlea</i>   |
| Planorbulinoidea  | Cibicididae       | <i>Cibicides</i>       |
|                   |                   | <i>Cibicidoides</i>    |
|                   |                   | <i>Heterolepa</i>      |
|                   |                   | <i>Lobatula</i>        |
|                   | Planorbulinidae   | <i>Planorbulina</i>    |
|                   |                   | <i>Planorbulinella</i> |
|                   | Cymbaloporidae    | <i>Millettiana</i>     |
|                   |                   | <i>Cymbaloporeta</i>   |
|                   |                   | <i>Cymbaloporella</i>  |
| Nonionioidea      | Nonionidae        | <i>Pseudononion</i>    |
|                   |                   | <i>Nonion</i>          |
|                   |                   | <i>Nonionella</i>      |
| Glabratelloidea   | Glabratellidae    | <i>Pileolina</i>       |
| Rotalioidea       | Elphidiidae       | <i>Protelphidium</i>   |
|                   |                   | <i>Elphidium</i>       |



|                |                  |                   |                        |
|----------------|------------------|-------------------|------------------------|
|                |                  |                   |                        |
|                |                  |                   | <i>Cribroelphidium</i> |
|                |                  |                   |                        |
|                |                  |                   | <i>Porosononion</i>    |
|                |                  | Elphidiellidae    | <i>Elphidiella</i>     |
|                |                  | Haynesinidae      | <i>Haynesina</i>       |
|                |                  | Ammoniidae        | <i>Ammonia</i>         |
|                |                  |                   |                        |
|                |                  |                   |                        |
|                |                  |                   |                        |
|                |                  |                   |                        |
|                |                  |                   | <i>Challengerella</i>  |
|                |                  |                   | <i>Asterorotalia</i>   |
|                |                  |                   |                        |
|                |                  |                   | <i>Rotalidium</i>      |
|                |                  |                   | <i>Rotalinoides</i>    |
|                |                  |                   | <i>Pseudorotalia</i>   |
|                |                  | Notorotaliidae    | <i>Cristatavultus</i>  |
|                | Acervulinoidea   | Acervulinidae     | <i>Acervulina</i>      |
|                | Asterigerinoidea | Amphisteginidae   | <i>Amphistegina</i>    |
|                |                  | Epistomariidae    | <i>Monspeliensina</i>  |
|                |                  | Asterigerinatidae | <i>Eoeponidella</i>    |
|                | Nummulitoidea    | Nummulitidae      | <i>Heterostegina</i>   |
|                |                  |                   | <i>Operculina</i>      |
|                | Murrayinellidae  | Murrayinellidae   | <i>Murrayinella</i>    |
| Polymorphinida | Polymorphinoidea | Glandulinidae     | <i>Glandulina</i>      |

|  |  |                  |                      |
|--|--|------------------|----------------------|
|  |  |                  | <i>Globulotuba</i>   |
|  |  | Polymorphinidae  | <i>Polymorphina</i>  |
|  |  |                  | <i>Guttulina</i>     |
|  |  |                  | <i>Globulina</i>     |
|  |  |                  | <i>Sigmomorphina</i> |
|  |  | Ellipsolagenidae | <i>Oolina</i>        |
|  |  |                  | <i>Buchnerina</i>    |
|  |  |                  | <i>Fissurina</i>     |

|                                                             |                                            |
|-------------------------------------------------------------|--------------------------------------------|
| ice                                                         | [39]                                       |
| Figure 1                                                    | 1                                          |
| it. N)                                                      | 29°02'-29°24'                              |
| ng. E)                                                      | 48°10'-48°28'                              |
| erval                                                       | n.a.                                       |
| ages                                                        | total                                      |
| umber                                                       | 15                                         |
| tion                                                        | n.a.                                       |
| iments                                                      | nc                                         |
| Species                                                     | Mina Al-Ahmadi and South of Failaka Island |
| <i>Ammobaculites agglutinans</i> (d'Orbigny, 1846)          |                                            |
| <i>Ammobaculites persicus</i> (Lutze, 1974)                 |                                            |
| <i>Ammobaculites</i> cf. <i>crassus</i> (Warren, 1957)      |                                            |
| <i>Ammobaculites</i> sp.                                    |                                            |
| <i>Ammomarginulina</i> sp.                                  |                                            |
| <i>Ammotium morenoi</i> (Acosta, 1940)                      |                                            |
| <i>Eggerelloides</i> cf. <i>advenus</i> (Cushman, 1922)     |                                            |
| <i>Eggerelloides scaber</i> (Williamson, 1858)              |                                            |
| <i>Gaudryina</i> sp.                                        |                                            |
| <i>Trochammina squamata</i> (Jones and Parker, 1960)        |                                            |
| <i>Portatrochammina</i> cf. <i>pacifica</i> (Cushman, 1925) |                                            |
| <i>Rotaliammina mayori</i> (Cushman, 1924)                  |                                            |
| <i>Sahulia barkeri</i> (Hofker, 1978)                       |                                            |
| <i>Sahulia conica</i> (d'Orbigny, 1839)                     | X                                          |
| <i>Sahulia kerimbaensis</i> (Said, 1949)                    |                                            |
| <i>Textularia aura</i> (Lalicker & McCullough, 1940)        |                                            |
| <i>Textularia bocki</i> (Höglund, 1947)                     | X                                          |
| <i>Textularia</i> cf. <i>canaensis</i> (Bermudez, 1949)     |                                            |
| <i>Textularia candeiana</i> (d'Orbigny, 1839)               |                                            |
| <i>Textularia cushmani</i> (Said, 1949)                     |                                            |
| <i>Textularia foliacea</i> (Heron-Allen & Earland, 1915)    | X                                          |
| <i>Textularia gramen</i> (d'Orbigny, 1846)                  |                                            |
| <i>Textularia lata</i> (Germeraad, 1946)                    | X                                          |
| <i>Textularia lateralis</i> (Lalicker, 1935)                |                                            |

|                                                                 |   |
|-----------------------------------------------------------------|---|
| <i>Textularia mariae</i> (d'Orbigny, 1846)                      |   |
| <i>Textularia occidentalis</i> (Cushman, 1922)                  |   |
| <i>Textularia porrecta</i> (Brady 1884)                         |   |
| <i>Textularia pseudogramen</i> (Chapman & Parr, 1937)           | X |
| <i>Textularia sagittula</i> (Defrance, 1824)                    |   |
| <i>Textularia semialata</i> (Cushman, 1913)                     | X |
| <i>Textularia truncata</i> (Höglund, 1947)                      | X |
| <i>Textularia</i> aff. <i>lateralis</i> (Lalicker, 1935)        |   |
| <i>Textularia</i> sp.                                           | X |
| <i>Siphotextularia affinis</i> (Fornasini, 1883)                | X |
| <i>Spirotextularia ornatissima</i> (Said, 1950)                 |   |
| <i>Siphotextularia</i> sp.                                      |   |
| <i>Bigennerina</i> sp.                                          |   |
| <i>Olgita pacifica</i> (Cushman, 1924)                          |   |
| <i>Clavulina angularis</i> (d'Orbigny, 1826)                    |   |
| <i>Reophax calcareus</i> (Cushman, 1947)                        |   |
| <i>Cornuspira planorbis</i> (Schultze, 1853)                    | X |
| <i>Adelosina bicornis</i> (Walker & Jacob, 1798)                |   |
| <i>Adelosina dagornae</i> (Levi et al., 1990)                   |   |
| <i>Adelosina elegans</i> var. <i>angulata</i> (Wiesner, 1923)   |   |
| <i>Adelosina honghensis</i> (Lak, 1982)                         |   |
| <i>Adelosina intricata</i> (Terquem, 1878)                      |   |
| <i>Adelosina longirostra</i> (d'Orbigny, 1826)                  |   |
| <i>Adelosina mediterraneensis</i> (Le Calvez & Le Calvez, 1958) |   |
| <i>Adelosina partschii</i> (d'Orbigny, 1846)                    |   |
| <i>Adelosina pulchella</i> (d'Orbigny, 1826)                    |   |
| <i>Adelosina</i> spp.                                           |   |
| <i>Flintinoides labiosa</i> (d'Orbigny, 1839)                   |   |
| <i>Hauerina compressa</i> (d'Orbigny, 1846)                     |   |
| <i>Hauerina</i> sp.                                             |   |
| <i>Sigmoihauerina bradyi</i> (Cushman, 1917)                    |   |
| <i>Spirosigmoilina</i> sp.                                      |   |
| <i>Cycloforina contorta</i> (d'Orbigny, 1846)                   |   |
| <i>Cycloforina gracilissima</i> (Bogdanowich, 1950)             |   |
| <i>Cycloforina granulocostata</i> (Germeraad, 1946)             |   |
| <i>Cycloforina macerata</i> (Cushman and Todd, 1944)            |   |
| <i>Cycloforina quinquecarinata</i> (Collins, 1958)              |   |
| <i>Cycloforina sidebottomi</i> (Rasheed, 1971)                  |   |
| <i>Cycloforina stomata</i> (Luczkowska, 1974)                   |   |
| <i>Miliolinella chukchiensis</i> (Loeblich & Tappan, 1953)      | X |
| <i>Miliolinella circularis</i> (Bornemann, 1855)                |   |
| <i>Miliolinella oceanica</i> (Cushman, 1932)                    |   |
| <i>Miliolinella semicostata</i> (Terquem, 1878)                 |   |
| <i>Miliolinella semicostata</i> (Wiesner, 1923)                 |   |
| <i>Miliolinella subrotunda</i> (Montagu, 1803)                  |   |
| <i>Miliolinella</i> cf. <i>californica</i> (Rhumbler, 1936)     |   |
| <i>Miliolinella</i> spp.                                        |   |
| <i>Cribromiliolinella milletti</i> (Cushman, 1954)              |   |
| <i>Miliolina peregrina</i> var. <i>striata</i> (Wiesner, 1912)  |   |
| <i>Miliolina</i> sp.                                            |   |
| <i>Lachlanella cooki</i> (Vella, 1957)                          |   |

|                                                                     |   |
|---------------------------------------------------------------------|---|
| <i>Lachlanella incisa</i> (Cushman and Todd 1932)                   |   |
| <i>Pseudolachlanella eburnea</i> (d'Orbigny, 1839)                  |   |
| <i>Massilina laevigata</i> (Cushman & Todd, 1944)                   |   |
| <i>Massilina secans</i> (d'Orbigny, 1826)                           |   |
| <i>Massilina secans</i> subsp. <i>tropicalis</i> (Collins, 1958)    |   |
| <i>Massilina</i> sp.                                                |   |
| <i>Pseudomassilina robusta</i> (Lacroix, 1938)                      |   |
| <i>Pseudomassilina</i> cf. <i>P. australis</i> (Cushman, 1932)      |   |
| <i>Pseudomassilina</i> sp.                                          |   |
| <i>Pseudotriloculina consobrina</i> (d'Orbigny, 1846)               |   |
| <i>Pseudotriloculina lecalvezeae</i> (Kaasschieter, 1961)           |   |
| <i>Pseudotriloculina rotunda</i> (d'Orbigny in Schlumberger, 1893)  |   |
| <i>Pseudotriloculina sidebottomi</i> (Martinotti, 1921)             |   |
| <i>Pseudotriloculina</i> cf. <i>P. subgranulata</i> (Cushman, 1918) |   |
| <i>Pseudotriloculina</i> sp.                                        |   |
| <i>Simuloculina</i> cf. <i>reversa</i> (d'Orbigny, 1852)            |   |
| <i>Ptychomiliola arabiensis</i> (Shublak, 1977)                     |   |
| <i>Ptychomiliola</i> sp.                                            |   |
| <i>Pseudopyrgo milletti</i> (Cushman, 1917)                         |   |
| <i>Pyrgo oblonga</i> (d'Orbigny, 1839)                              |   |
| <i>Pyrgo</i> sp.                                                    |   |
| <i>Pyrgoella sphaera</i> (d'Orbigny, 1839)                          |   |
| <i>Proemassilina rugosa</i> (Sidebottom, 1904)                      |   |
| <i>Proemassilina arenaria</i> (Brady, 1884)                         | X |
| <i>Quinqueloculina agglutinans</i> (d'Orbigny, 1839)                |   |
| <i>Quinqueloculina akneriana</i> (d'Orbigny, 1846)                  |   |
| <i>Quinqueloculina aspera</i> (d'Orbigny, 1826)                     |   |
| <i>Quinqueloculina bicarinata</i> (d'Orbigny in Terquem, 1878)      |   |
| <i>Quinqueloculina berthelotiana</i> (d'Orbigny, 1839)              |   |
| <i>Quinqueloculina bosciana</i> (d'Orbigny, 1839)                   |   |
| <i>Quinqueloculina boueana</i> (d'Orbigny, 1846)                    |   |
| <i>Quinqueloculina bubyensis</i> (Shublak, 1977)                    |   |
| <i>Quinqueloculina buchiana</i> (d'Orbigny, 1846)                   |   |
| <i>Quinqueloculina carinatastriata</i> (Wiesner, 1923)              |   |
| <i>Quinqueloculina catalinensis</i> (Natland, 1938)                 |   |
| <i>Quinqueloculina costata</i> (d'Orbigny in Terquem, 1878)         |   |
| <i>Quinqueloculina corrugata</i> (Collins, 1958)                    |   |
| <i>Quinqueloculina crassicarinata</i> (Collins, 1958)               | X |
| <i>Quinqueloculina cuvieriana</i> (d'Orbigny, 1839)                 |   |
| <i>Quinqueloculina goesi</i> (Todd & Brönnimann, 1957)              |   |
| <i>Quinqueloculina haidingerii</i> (d'Orbigny, 1846)                |   |
| <i>Quinqueloculina hauerina</i> (d'Orbigny, 1846)                   |   |
| <i>Quinqueloculina homoplanciana</i> (Haake, 1975)                  |   |
| <i>Quinqueloculina implexa</i> (Terquem & Terquem, 1886)            |   |
| <i>Quinqueloculina irregularis</i> (d'Orbigny in Terquem, 1878)     |   |
| <i>Quinqueloculina lamarkiana</i> (d'Orbigny, 1839)                 |   |
| <i>Quinqueloculina laticollis</i> (Le Calvez & Le Calvez, 1958)     |   |
| <i>Quinqueloculina latidentella</i> (Loeblich & Tappan, 1994)       |   |
| <i>Quinqueloculina mosharrafai</i> (Said, 1949)                     |   |
| <i>Quinqueloculina multimarginata</i> (Said, 1949)                  | X |
| <i>Quinqueloculina neosigmoilinoidea</i> (Kennett, 1966)            | X |

|                                                                             |   |
|-----------------------------------------------------------------------------|---|
| <i>Quinqueloculina parakneriana</i> (Luczkowska, 1974)                      |   |
| <i>Quinqueloculina parkeri</i> (Brady, 1881)                                |   |
| <i>Quinqueloculina parvaggluta</i> (Vella, 1957)                            |   |
| <i>Quinqueloculina peregrina</i> (d'Orbigny, 1846)                          |   |
| <i>Quinqueloculina poeyana</i> (d'Orbigny, 1839)                            |   |
| <i>Quinqueloculina polygona</i> (d'Orbigny, 1839)                           |   |
| <i>Quinqueloculina pseudobuchiana</i> (Luczkowska, 1974)                    |   |
| <i>Quinqueloculina quinquecarinata</i> (Collins, 1958)                      |   |
| <i>Quinqueloculina rebecca</i> (Vella, 1957)                                |   |
| <i>Quinqueloculina schlumbergeri</i> (Wiesner, 1923)                        |   |
| <i>Quinqueloculina seminula</i> (Linnaeus, 1758)                            |   |
| <i>Quinqueloculina subcarinata</i> (d'Orbigny in Terquem, 1878)             |   |
| <i>Quinqueloculina subcuneata</i> (Cushman, 1921)                           |   |
| <i>Quinqueloculina subpolygona</i> (Parr, 1945)                             |   |
| <i>Quinqueloculina tropicalis</i> (Cushman, 1924)                           |   |
| <i>Quinqueloculina tubus</i> (Todd, 1957)                                   |   |
| <i>Quinqueloculina variolata</i> (d'Orbigny in Terquem, 1878)               |   |
| <i>Quinqueloculina venusta</i> (Karrer, 1868)                               |   |
| <i>Quinqueloculina vulgaris</i> (d'Orbigny, 1826)                           |   |
| <i>Quinqueloculina</i> aff. <i>rugosa</i> (d'Orbigny, 1852)                 |   |
| <i>Quinqueloculina</i> cf. <i>Q. crenulata</i> (Cushman, 1932)              |   |
| <i>Quinqueloculina</i> cf. <i>Q. exmouthensis</i> (Parker, 2009)            |   |
| <i>Quinqueloculina</i> cf. <i>Q. impressa</i> (Reuss, 1851)                 |   |
| <i>Quinqueloculina</i> cf. <i>Q. inaequalis</i> (Cushman, 1921)             |   |
| <i>Quinqueloculina</i> cf. <i>Q. latidentella</i> (Loeblich & Tappan, 1994) |   |
| <i>Quinqueloculina</i> cf. <i>Q. multimarginata</i> (Said, 1949)            |   |
| <i>Quinqueloculina</i> cf. <i>Q. neostriatula</i> (Thalmann, 1950)          |   |
| <i>Quinqueloculina</i> cf. <i>Q. oblonga</i> (Montagu, 1803)                |   |
| <i>Quinqueloculina</i> cf. <i>Q. peregrina</i> (d'Orbigny, 1846)            |   |
| <i>Quinqueloculina</i> cf. <i>Q. philippinensis</i> (Cushman, 1921)         |   |
| <i>Quinqueloculina</i> spp.                                                 | X |
| <i>Parrina bradyi</i> (Millett, 1898)                                       |   |
| <i>Affinetrina gualtieriana</i> (d'Orbigny 1839)                            |   |
| <i>Affinetrina planciana</i> (d'Orbigny, 1839)                              |   |
| <i>Affinetrina quadrilateralis</i> (d'Orbigny, 1839)                        |   |
| <i>Affinetrina ucrainica</i> (Serova, 1952)                                 |   |
| <i>Triloculina angularis</i> (d'Orbigny, 1850)                              |   |
| <i>Triloculina arabica</i> (Shublak, 1977)                                  |   |
| <i>Triloculina barnardi</i> (Haig, 1988)                                    |   |
| <i>Triloculina bikiniensis</i> (Todd, 1954)                                 |   |
| <i>Triloculina chemnitziana</i> (d'Orbigny, 1839)                           |   |
| <i>Triloculina elongata</i> (d'Orbigny in Fornasini, 1905)                  |   |
| <i>Triloculina gibba</i> (d'Orbigny, 1826)                                  |   |
| <i>Triloculina echinata</i> (d'Orbigny in Fornasini, 1905)                  |   |
| <i>Triloculina inornata</i> subsp. <i>longidentata</i> (Bandy, 1953)        |   |
| <i>Triloculina intermedia</i> (Karrer, 1868)                                |   |
| <i>Triloculina earlandi</i> (Cushman, 1954)                                 | X |
| <i>Triloculina echinata</i> (d'Orbigny in Fornasini, 1905)                  | X |
| <i>Triloculina marioni</i> (Schlumberger, 1893)                             | X |
| <i>Triloculina oblonga</i> (Montagu, 1803)                                  |   |
| <i>Triloculina propinqua</i> (Terquem Em. Le Calvez, 1947)                  |   |

|                                                              |   |
|--------------------------------------------------------------|---|
| <i>Triloculina schreiberiana</i> (d'Orbigny, 1839)           |   |
| <i>Triloculina selene</i> (Karrer, 1868)                     |   |
| <i>Triloculina striatopunctata</i> (Shublak, 1977)           |   |
| <i>Triloculina terquemiana</i> (Brady, 1884)                 |   |
| <i>Triloculina tricarinata</i> d'Orbigny in Deshayes, 1832)  | X |
| <i>Triloculina trigonula</i> (Lamarck, 1804)                 | X |
| <i>Triloculina trihedra</i> (Loeblich and Tappan, 1953)      |   |
| <i>Triloculina</i> cf. <i>T. serrulata</i> (McCulloch, 1977) |   |
| <i>Triloculina</i> spp.                                      | X |
| <i>Triloculinella asymmetrica</i> (Said, 1949)               | X |
| <i>Triloculinella chiasmocytis</i> (Loeblich & Tappan, 1994) |   |
| <i>Triloculinella dilatata</i> (d'Orbigny, 1839)             |   |
| <i>Triloculinella obliquinodus</i> (Riccio, 1950)            |   |
| <i>Triloculinella pseudooblonga</i> (Zheng, 1980)            |   |
| <i>Biloculinella wiesneri</i> (Le Calvez & Le Calvez, 1958)  |   |
| <i>Varidentella contorta</i> (d'Orbigny 1846)                |   |
| <i>Varidentella neostriatula</i> (Thalmann, 1950)            |   |
| <i>Varidentella rotunda</i> (Gerke 1938)                     |   |
| <i>Varidentella pseudocostata</i> (Vengilinsky 1958)         |   |
| <i>Varidentella</i> sp.                                      |   |
| <i>Mesosigmoilina minuta</i> (Zheng, 1979)                   |   |
| <i>Sigmoilina sigmoidea</i> (Brady, 1884)                    |   |
| <i>Sigmoilina</i> sp.                                        |   |
| <i>Sigmoilopsis asperula</i> (Karrer, 1868)                  | X |
| <i>Sigmoilopsis foeda</i> (Reuss, 1850)                      |   |
| <i>Sigmoilopsis minuta</i> (Collins, 1958)                   | X |
| <i>Sigmoilopsis schlumbergeri</i> (Silvestri, 1904)          |   |
| <i>Sigmoilinella tortuosa</i> (Zheng, 1979)                  |   |
| <i>Siphonaperta dilatata</i> (Le Calvez & Le Calvez, 1958)   |   |
| <i>Siphonaperta distorquata</i> (Cushman, 1954)              |   |
| <i>Siphonaperta granulata</i> (Smigielska, 1957)             |   |
| <i>Siphonaperta</i> cf. <i>S. horrida</i> (Cushman, 1947)    |   |
| <i>Siphonaperta</i> spp.                                     |   |
| <i>Articulina alticostata</i> (Cushman, 1944)                |   |
| <i>Articulina queenslandica</i> Collins, 1958                |   |
| <i>Articulina</i> sp.                                        |   |
| <i>Ishamella apertura</i> (Buzas and Severin, 1982)          |   |
| <i>Steigerina bubnanensis</i> (McCulloch, 1977)              |   |
| <i>Sigmamiliolinella australis</i> (Parr, 1932)              |   |
| <i>Spiroloculina acicularis</i> (Batsch, 1791)               |   |
| <i>Spiroloculina angulata</i> (Cushman, 1917)                |   |
| <i>Spiroloculina antillarum</i> (d'Orbigny, 1838)            |   |
| <i>Spiroloculina carinata</i> (Fornasini, 1905)              |   |
| <i>Spiroloculina communis</i> (Cushman & Todd, 1944)         | X |
| <i>Spiroloculina depressa</i> (d'Orbigny, 1826)              |   |
| <i>Spiroloculina dentata</i> (Cushman & Todd, 1944)          |   |
| <i>Spiroloculina excavata</i> (d'Orbigny, 1846)              |   |
| <i>Spiroloculina henbesti</i> (Petri, 1955)                  |   |
| <i>Spiroloculina interrupta</i> (Terquem, 1878)              |   |
| <i>Spiroloculina lucida</i> (Cushman & Todd, 1944)           |   |
| <i>Spiroloculina nummiformis</i> (Said, 1949)                | X |

|                                                               |   |
|---------------------------------------------------------------|---|
| <i>Spiroloculina pulchella</i> (d'Orbigny in Fornasini, 1904) |   |
| <i>Spiroloculina regularis</i> (Cushman & Todd, 1944)         |   |
| <i>Spiroloculina rotunda</i> (d'Orbigny, 1826)                |   |
| <i>Spiroloculina subcarinata</i> (D'Orbigny 1826)             |   |
| <i>Spiroloculina</i> cf. <i>nitida</i> (d'Orbigny, 1826)      |   |
| <i>Spiroloculina</i> sp.                                      |   |
| <i>Pseudohauerinella orientalis</i> (Cushman, 1946)           |   |
| <i>Vertebralina striata</i> (d'Orbigny, 1826)                 |   |
| <i>Wiesnerella auriculata</i> (Egger, 1893)                   |   |
| <i>Ophthalmidium arabianensis</i> (Shublak, 1977)             |   |
| <i>Ophthalmidium</i> sp.                                      |   |
| <i>Edentostomina constans</i> (Bandy, 1949)                   |   |
| <i>Edentostomina cultrata</i> (Brady, 1881)                   |   |
| <i>Edentostomina rupertiana</i> (Brady, 1881)                 |   |
| <i>Edentostomina triangularis</i> (El-Naggar & Anber, 1974)   |   |
| <i>Spirophthalmidium acutimargo</i> (Brady, 1884)             |   |
| <i>Nodophthalmidium</i> sp.                                   |   |
| <i>Nubecularia</i> sp.                                        |   |
| <i>Nodobaculalia</i> sp.                                      |   |
| <i>Peneroplis arietinus</i> (Batsch, 1791)                    |   |
| <i>Peneroplis planatus</i> (Fichtel and Moll, 1798)           |   |
| <i>Peneroplis pertusus</i> (Forsskal in Niebuhr, 1775)        |   |
| <i>Coscinospira hemprichii</i> (Ehrenberg, 1839)              |   |
| <i>Spirolina</i> sp.                                          |   |
| <i>Dendritina elegans</i> (d'Orbigny, 1846)                   |   |
| <i>Dendritina rangi</i> (d'Orbigny in Fornasini, 1904)        |   |
| <i>Sorites marginalis</i> (Lamarck, 1816)                     |   |
| <i>Sorites orbiculus</i> (Forsskal in Niebuhr, 1775)          |   |
| <i>Miliammina</i> cf. <i>fusca</i> (Brady, 1870)              |   |
| <i>Miliammina</i> sp.                                         | X |
| <i>Squamulina</i> sp.                                         |   |
| <i>Spirillina vivipara</i> (Ehrenberg, 1843)                  |   |
| <i>Spirillina</i> sp.                                         |   |
| <i>Patellina corrugata</i> (Williamson, 1858)                 |   |
| <i>Lagena doveyensis</i> (Haynes, 1973)                       |   |
| <i>Lagena</i> cf. <i>hispidula</i> (Cushman, 1913)            |   |
| <i>Lagena perlucida</i> (Montagu, 1803)                       | X |
| <i>Lagena semilineata</i> (Wright, 1886)                      | X |
| <i>Lagena semistriata</i> (Williamson, 1848)                  | X |
| <i>Lagena spirata</i> (Bandy, 1949)                           | X |
| <i>Lagena striata</i> (Bandy, 1949)                           |   |
| <i>Lagena sulcata</i> var. <i>torquiformis</i> (Haynes 1973)  |   |
| <i>Lagena substriata</i> (Williamson, 1848)                   |   |
| <i>Lagena tenuis</i> (Bornemann, 1855)                        | X |
| <i>Lagena</i> sp.                                             |   |
| <i>Procerolagena distoma</i> (Parker & Jones, 1864)           |   |
| <i>Procerolagena oceanica</i> (Albani, 1974)                  |   |
| <i>Procerolagena setigera</i> (Millett, 1901)                 | X |
| <i>Hyalinonetrion distomapolitum</i> (Parker & Jones, 1865)   |   |
| <i>Hyalinonetrion gracile</i> (Costa, 1856)                   |   |
| <i>Hyalinonetrion gracillimum</i> (Seguenza, 1862)            | X |



|                                                                  |   |
|------------------------------------------------------------------|---|
| <i>Reusoolina laevis</i> (Montagu, 1803)                         | X |
| <i>Pyramidolina</i> sp.                                          |   |
| <i>Dentalina</i> sp.                                             |   |
| <i>Nodosaria</i> sp.                                             |   |
| <i>Laevidentalina communis</i> (d'Orbigny, 1826)                 | X |
| <i>Lenticulina</i> sp.                                           |   |
| <i>Pseudobulimina</i> sp. <i>P. convoluta</i> (Williamson, 1858) |   |
| <i>Bulimina marginata</i> (d'Orbigny, 1826)                      | X |
| <i>Reussella aculeata</i> (Cushman, 1945)                        | X |
| <i>Reussella aequa</i> (Cushman & McCulloch, 1948)               | X |
| <i>Reussella pulchra</i> (Cushman, 1945)                         | X |
| <i>Reussella pacifica</i> (Cushman & McCulloch, 1948)            |   |
| <i>Reussella</i> spp.                                            |   |
| <i>Fijiella simplex</i> (Cushman, 1929)                          | X |
| <i>Quirimbatina rimosa</i> (Heron-Allen & Earland, 1915)         |   |
| <i>Trimosina milletti</i> (Cushman, 1927)                        |   |
| <i>Parabrizalina porrecta</i> (Brady, 1881)                      |   |
| <i>Sagrinella convallaria</i> (Millett, 1900)                    |   |
| <i>Neocassidulina abbreviata</i> (Heron-Allen and Earland, 1924) |   |
| <i>Euloxostomum</i> sp.                                          |   |
| <i>Loxostomina limbata</i> (Brady, 1881)                         | X |
| <i>Loxostomina</i> sp.                                           | X |
| <i>Pseudobrizalina lobata</i> (Brady, 1881)                      |   |
| <i>Bolivinelina pseudopunctata</i> (Höglund, 1947)               |   |
| <i>Rectobolivina abrupta</i> (Phleger & Parker, 1952)            |   |
| <i>Tortoplectella rhomboidalis</i> (Millett, 1899)               |   |
| <i>Buccella frigida</i> (Cushman, 1922)                          | X |
| <i>Riminopsis asterizans</i> (Fichtel & Moll, 1798)              |   |
| <i>Fursenkoina schreibersiana</i> (Czjzek, 1848)                 | X |
| <i>Fursenkoina squamosa</i> (d'Orbigny in Deshayes, 1832)        |   |
| <i>Floresina durrandi</i> (Revets, 1990)                         | X |
| <i>Hopkinsina pacifica</i> (Cushman, 1933)                       | X |
| <i>Stainforthia concava</i> (Höglund 1947)                       |   |
| <i>Bolivina alata</i> (Seguenza, 1862)                           | X |
| <i>Bolivina dilatata</i> (Reuss, 1950)                           |   |
| <i>Bolivina nitida</i> (Brady, 1884)                             |   |
| <i>Bolivina punctata</i> (d'Orbigny, 1839)                       |   |
| <i>Bolivina spathulata</i> (Williamson, 1858)                    | X |
| <i>Bolivina striatula</i> (Cushman, 1922)                        |   |
| <i>Bolivina substriatula</i> (Asano, 1958)                       |   |
| <i>Bolivina vadescens</i> (Cushman, 1933)                        |   |
| <i>Bolivina variabilis</i> (Williamson, 1858)                    |   |
| <i>Bolivina</i> spp.                                             |   |
| <i>Rosalina adhaerens</i> (Murray, 1965)                         |   |
| <i>Rosalina anomala</i> (Terquem, 1875)                          |   |
| <i>Rosalina bradyi</i> (Cushman, 1915)                           |   |
| <i>Rosalina densitiva</i> (McCulloch, 1977)                      |   |
| <i>Rosalina globularis</i> (d'Orbigny, 1826)                     | X |
| <i>Rosalina orientalis</i> (Cushman, 1925)                       |   |
| <i>Rosalina</i> spp.                                             |   |
| <i>Neoconorbina clara</i> (Cushman, 1934)                        |   |

|                                                                             |   |
|-----------------------------------------------------------------------------|---|
| <i>Neoconorbina</i> cf. <i>terquemi</i> (Rzehak, 1888)                      |   |
| <i>Gavelinopsis praeegeri</i> (Heron-Allen & Earland, 1913)                 |   |
| <i>Eponides cribrorepandus</i> (Asano & Uchio, 1951)                        |   |
| <i>Eponides repandus</i> (Fichtel & Moll, 1798)                             | X |
| <i>Poroeponides</i> sp.                                                     |   |
| <i>Cancris auricula</i> (Fichtel & Moll, 1798)                              |   |
| <i>Cancris</i> sp.                                                          |   |
| <i>Valvulineria rugosa</i> (d'Orbigny, 1839)                                |   |
| <i>Discorbis vilardeboanus</i> (d'Orbigny, 1839)                            | X |
| <i>Helenina anderseni</i> (Warren, 1957)                                    |   |
| <i>Discorbinella montereyensis</i> (Cushman & Martin, 1935)                 |   |
| <i>Discorbinella</i> sp.                                                    |   |
| <i>Hanzawaia boueana</i> (d'Orbigny, 1846)                                  | X |
| <i>Hanzawaia</i> cf. <i>H. nipponica</i> (Asano, 1944)                      |   |
| <i>Facetocochlea pulchra</i> (Cushman, 1933)                                |   |
| <i>Cibicidoides lobatulus</i> (Walker & Jacob, 1798)                        |   |
| <i>Cibicides refulgens</i> (Montfort, 1808)                                 |   |
| <i>Cibicides</i> sp.                                                        |   |
| <i>Cibicidoides</i> spp.                                                    |   |
| <i>Cibicidoides</i> cf. <i>subhaidingerii</i> (Parr, 1950)                  | X |
| <i>Heterolepa dutemplei</i> (d'Orbigny, 1846)                               |   |
| <i>Lobatula mayori</i> (Cushman, 1924)                                      |   |
| <i>Planorbulina mediterraneensis</i> (d'Orbigny, 1826)                      |   |
| <i>Planorbulinella elatensis</i> (Thomas, 1977)                             |   |
| <i>Millettiana milletti</i> (Heron-Allen & Earland, 1915)                   |   |
| <i>Cymbaloporeta bradyi</i> (Cushman, 1915)                                 |   |
| <i>Cymbaloporeta hemisphaerica</i> (Accordi & Selmi, 1952)                  |   |
| <i>Cymbaloporeta squamosa</i> (d'Orbigny, 1839)                             |   |
| <i>Cymbaloporeta</i> spp.                                                   |   |
| <i>Cymbaloporella tabellaeformis</i> (Brady, 1884)                          |   |
| <i>Pseudononion japonicum</i> (Asano, 1936)                                 | X |
| <i>Nonion bogdanowiczi</i> (Voloshinova, 1952)                              |   |
| <i>Nonion nicobarensis</i> (Cushman, 1936)                                  |   |
| <i>Nonion</i> sp.                                                           | X |
| <i>Nonionella pulchella</i> (Hada, 1931)                                    |   |
| <i>Nonionella japonica</i> var. <i>mexicana</i> (Cushman & McCulloch, 1940) |   |
| <i>Nonionella</i> sp.                                                       | X |
| <i>Pileolina patelliformis</i> (Brady, 1884)                                |   |
| <i>Protelphidium hofkeri</i> (Haynes, 1956)                                 |   |
| <i>Protelphidium</i> sp.                                                    |   |
| <i>Elphidium advenum</i> (Cushman, 1922)                                    | X |
| <i>Elphidium advenum</i> subsp. <i>limbatum</i> (Chapman, 1907)             |   |
| <i>Elphidium chipolensis</i> (Cushman, 1920)                                |   |
| <i>Elphidium craticulatum</i> (Fichtel and Moll, 1798)                      |   |
| <i>Elphidium crispum</i> (Linnaeus, 1758)                                   |   |
| <i>Elphidium discoidale</i> (d'Orbigny, 1839)                               | X |
| <i>Elphidium jenseni</i> (Cushman, 1924)                                    |   |
| <i>Elphidium macellum</i> (Fichtel & Moll, 1798)                            | X |
| <i>Elphidium margaritaceum</i> (Cushman, 1930)                              |   |
| <i>Elphidium reticulosum</i> (Cushman, 1933)                                |   |
| <i>Elphidium tongaense</i> (Cushman, 1931)                                  |   |

|                                                                        |   |
|------------------------------------------------------------------------|---|
| <i>Elphidium</i> cf. <i>alvaregianum</i> (d'Orbigny, 1839)             |   |
| <i>Elphidium</i> spp.                                                  |   |
| <i>Criboelphidium albiumbilicatum</i> (Weiss, 1954)                    |   |
| <i>Criboelphidium clarum</i> (Krashennikov, 1960)                      |   |
| <i>Criboelphidium excavatum</i> (Terquem, 1875)                        |   |
| <i>Criboelphidium incertum</i> (Williamson, 1858)                      |   |
| <i>Criboelphidium poeyanum</i> (d'Orbigny, 1839)                       |   |
| <i>Porosonion</i> spp.                                                 |   |
| <i>Elphidiella</i> sp.                                                 |   |
| <i>Haynesina germanica</i> (Ehrenberg, 1840)                           |   |
| <i>Haynesina</i> sp.                                                   |   |
| <i>Ammonia aberdoveyensis</i> (Haynes, 1973)                           |   |
| <i>Ammonia beccarii</i> (Linnaeus, 1758)                               | X |
| <i>Ammonia elegans</i> (d'Orbigny 1826)                                |   |
| <i>Ammonia faceta</i> (He, Hu & Wang, 1965)                            |   |
| <i>Ammonia falsobeccarii</i> (Rouvillois, 1974)                        |   |
| <i>Ammonia nakazatoensis</i> (Kuwano, 1950)                            |   |
| <i>Ammonia sadoensis</i> (Asano, 1951)                                 |   |
| <i>Ammonia tepida</i> (Cushman, 1926)                                  |   |
| <i>Ammonia umbonata</i> (Le Roy, 1944)                                 |   |
| <i>Ammonia</i> cf. <i>aberdoveyensis</i> (Haynes, 1973)                |   |
| <i>Ammonia</i> cf. <i>convexa</i> (Collins, 1958)                      |   |
| <i>Ammonia</i> cf. <i>parkinsoniana</i> (d'Orbigny, 1839)              |   |
| <i>Ammonia</i> spp.                                                    |   |
| <i>Challengerella bradyi</i> (Billman, Hottinger and Oesterle, 1980)   |   |
| <i>Challengerella persica</i> (Billman, Hottinger & Oesterle, 1980)    |   |
| <i>Challengerella</i> sp.                                              |   |
| <i>Asterorotalia dentata</i> (Parker & Jones, 1865)                    | X |
| <i>Asterorotalia inflata</i> (Millelt, 1904)                           | X |
| <i>Asterorotalia milletti</i> (Hottinger and Oesterle, 1980)           |   |
| <i>Asterorotalia multispinosa</i> Nakamura, 1937                       |   |
| <i>Asterorotalia concinna</i> Millet 1904                              | X |
| <i>Asterorotalia</i> spp.                                              |   |
| <i>Rotalidium annectens</i> (Parker & Jones, 1865)                     | X |
| <i>Rotalinoides compressiuscula</i> (Brady, 1884)                      |   |
| <i>Pseudorotalia schroeteriana</i> (Parker & Jones in Carpenter, 1862) |   |
| <i>Cristatavultus milletti</i> (Heron-Allen & Earland, 1915)           |   |
| <i>Acervulina mabahethi</i> (Said, 1949)                               |   |
| <i>Acervulina inhaerens</i> (Schulze, 1854)                            |   |
| <i>Amphistegina lessonii</i> (d'Orbigny in Guérin-Méneville, 1832)     |   |
| <i>Monspeliensisina</i> sp.                                            |   |
| <i>Eoeponidella</i> cf. <i>multisecta</i> (Galloway & Heminway, 1941)  |   |
| <i>Heterostegina depressa</i> (d'Orbigny, 1826)                        |   |
| <i>Heterostegina</i> sp.                                               |   |
| <i>Operculina ammonoides</i> (Gronovius, 1781)                         |   |
| <i>Operculina complanata</i> (Defrance in Blainville, 1822)            |   |
| <i>Operculina gaimardi</i> (d'Orbigny in Deshayes, 1832)               | X |
| <i>Operculina</i> sp.                                                  |   |
| <i>Murrayinella murrayi</i> (Heron-Allen & Earland, 1915)              |   |
| <i>Murrayinella globosa</i> (Millet, 1903)                             |   |
| <i>Glandulina</i> sp.                                                  |   |

|                                                                 |   |
|-----------------------------------------------------------------|---|
| <i>Globulotuba entosoleniformis</i> (Collins, 1958)             | X |
| <i>Globulotuba</i> sp.                                          | X |
| <i>Polymorphina</i> sp.                                         |   |
| <i>Guttulina</i> cf. <i>sadoensis</i> (Cushman and Ozawa, 1928) |   |
| <i>Globulina</i> cf. <i>tropicale</i> (Petri, 1957)             |   |
| <i>Globulina</i> sp.                                            |   |
| <i>Sigmomorphina semisecta</i> (Reuss, 1867)                    |   |
| <i>Sigmomorphina</i> sp.                                        |   |
| <i>Oolina</i> cf. <i>hexagona</i> (Williamson, 1848)            |   |
| <i>Oolina laevigata</i> (d'Orbigny, 1839)                       |   |
| <i>Oolina</i> sp.                                               |   |
| <i>Buchnerina milletti</i> (Todd in Cushman, Todd & Post, 1954) |   |
| <i>Fissurina cucurbitasema</i> (Loeblich & Tappan, 1953)        |   |
| <i>Fissurina laevigata</i> (Reuss, 1850)                        |   |
| <i>Fissurina lucida</i> (Williamson, 1848)                      |   |
| <i>Fissurina marginata</i> (Montagu, 1803)                      | X |
| <i>Fissurina pedunculata</i> (Seguenza, 1862)                   |   |
| <i>Fissurina tricarinata</i> (Terquem, 1882)                    |   |
| <i>Fissurina</i> spp.                                           |   |

| [40]                  | [41]                  | [42]          | [43]          | [44]                       | [45]                       | [46]                       |
|-----------------------|-----------------------|---------------|---------------|----------------------------|----------------------------|----------------------------|
| 2                     | 3                     | 4             | 5             | 6                          | 7                          | 8                          |
| 28°33'-29°30'         | 28°33'-29°50'         | 28°33'-29°33' | 28°35'-29°34' | 28°40'                     | 28°37'-28°41'              | 28°33'-29°50'              |
| 47°45'-48°50'         | 47°45'-48°50'         | 47°47'-48°27' | 47°47'-48°10' | 48°20'                     | 48°20'-48°23'              | 47°45'-48°50'              |
| n.a.                  | n.a.                  | n.a.          | n.a.          | n.a.                       | <7                         | n.a.                       |
| total                 | total                 | total         | total         | total                      | total                      | total                      |
| 56                    | 12                    | n.a.          | 124           | 1                          | 180                        | 250                        |
| n.a.                  | >75 µm                | n.a.          | n.a.          | n.a.                       | n.a.                       | n.a.                       |
| nc                    | nc                    | TF            | TF            | SC                         | SC                         | nc                         |
| Northern Arabian Gulf | Northern Arabian Gulf | Tidal flats   | Tidal flats   | Al-Khiran, Southern coasts | Al-Khiran, Southern coasts | Coastal and offshore areas |
|                       |                       |               |               |                            |                            |                            |
|                       |                       |               |               |                            |                            | X                          |
| X                     |                       |               |               |                            |                            |                            |
|                       |                       |               |               |                            |                            |                            |
|                       |                       |               |               |                            |                            | X                          |
|                       | X                     |               |               |                            |                            |                            |
|                       | X                     |               |               |                            |                            | X                          |
|                       |                       |               |               |                            |                            |                            |
|                       | X                     |               |               |                            |                            |                            |
|                       |                       |               |               |                            |                            | X                          |
|                       | X                     |               |               |                            |                            |                            |
|                       | X                     |               |               |                            |                            |                            |
|                       |                       |               |               |                            |                            |                            |
| X                     | X                     |               |               |                            |                            |                            |
|                       |                       |               |               |                            |                            |                            |
|                       | X                     |               |               |                            |                            |                            |
| X                     |                       |               |               |                            |                            |                            |
|                       | X                     |               |               |                            |                            |                            |
|                       | X                     |               |               |                            |                            |                            |
|                       |                       |               |               |                            |                            |                            |
| X                     | X                     |               |               |                            | X                          |                            |
|                       |                       |               |               |                            |                            |                            |
|                       |                       |               |               |                            |                            |                            |
|                       |                       |               |               |                            |                            |                            |

|   |   |  |   |  |   |   |
|---|---|--|---|--|---|---|
|   | X |  |   |  |   |   |
|   | X |  |   |  |   |   |
|   |   |  |   |  |   |   |
| X | X |  |   |  |   |   |
|   | X |  |   |  |   |   |
| X |   |  |   |  |   |   |
| X | X |  |   |  |   |   |
|   | X |  |   |  |   |   |
|   | X |  |   |  |   | X |
| X |   |  |   |  |   |   |
|   | X |  |   |  |   |   |
|   |   |  |   |  |   |   |
|   | X |  |   |  |   |   |
|   | X |  |   |  | X |   |
|   |   |  |   |  | X |   |
|   |   |  |   |  |   | X |
| X | X |  |   |  | X |   |
|   | X |  |   |  |   |   |
|   |   |  |   |  |   |   |
|   |   |  |   |  |   |   |
|   |   |  |   |  |   |   |
|   | X |  |   |  |   |   |
| X |   |  |   |  |   |   |
|   |   |  |   |  |   |   |
|   |   |  |   |  |   |   |
|   |   |  |   |  |   |   |
|   |   |  |   |  |   |   |
|   |   |  |   |  |   |   |
|   |   |  |   |  |   |   |
|   |   |  |   |  |   |   |
|   |   |  |   |  |   |   |
|   |   |  |   |  |   |   |
|   | X |  |   |  | X |   |
|   |   |  |   |  |   |   |
| X | X |  |   |  |   |   |
|   |   |  |   |  |   |   |
|   |   |  |   |  |   |   |
|   |   |  |   |  |   |   |
|   |   |  |   |  |   |   |
|   | X |  |   |  |   |   |
|   | X |  |   |  |   | X |
|   | X |  |   |  |   |   |
|   | X |  | X |  |   |   |
|   |   |  |   |  |   |   |
|   |   |  |   |  |   |   |
|   |   |  |   |  |   |   |
|   |   |  |   |  |   |   |

|   |   |  |  |  |   |   |
|---|---|--|--|--|---|---|
|   |   |  |  |  |   |   |
|   |   |  |  |  |   |   |
| X | X |  |  |  |   | X |
|   |   |  |  |  | X |   |
|   |   |  |  |  | X |   |
|   | X |  |  |  |   | X |
|   |   |  |  |  |   |   |
|   | X |  |  |  |   |   |
|   |   |  |  |  |   |   |
|   | X |  |  |  |   |   |
|   |   |  |  |  |   |   |
|   |   |  |  |  |   |   |
|   | X |  |  |  |   |   |
|   |   |  |  |  |   |   |
|   |   |  |  |  | X |   |
|   |   |  |  |  |   |   |
| X |   |  |  |  |   |   |
|   | X |  |  |  |   |   |
|   | X |  |  |  |   |   |
| X | X |  |  |  |   | X |
|   |   |  |  |  | X |   |
|   |   |  |  |  |   |   |
|   |   |  |  |  |   |   |
|   |   |  |  |  |   |   |
|   |   |  |  |  |   |   |
|   | X |  |  |  |   |   |
|   |   |  |  |  |   |   |
|   |   |  |  |  |   |   |
|   | X |  |  |  |   |   |
| X |   |  |  |  |   |   |
| X | X |  |  |  |   |   |
|   |   |  |  |  |   |   |
|   | X |  |  |  |   |   |
|   |   |  |  |  |   |   |
|   |   |  |  |  |   |   |
|   |   |  |  |  |   |   |
| X |   |  |  |  |   |   |
|   |   |  |  |  |   |   |
|   | X |  |  |  |   |   |
|   |   |  |  |  |   |   |
|   |   |  |  |  |   |   |
|   |   |  |  |  |   |   |
| X | X |  |  |  |   |   |
| X | X |  |  |  |   |   |

|   |   |  |   |  |   |   |
|---|---|--|---|--|---|---|
|   |   |  |   |  |   |   |
|   | X |  |   |  |   |   |
|   |   |  |   |  |   |   |
|   |   |  |   |  |   |   |
|   | X |  |   |  |   |   |
|   |   |  |   |  |   |   |
|   |   |  |   |  |   |   |
|   |   |  |   |  |   |   |
|   |   |  |   |  |   |   |
|   |   |  |   |  |   |   |
|   | X |  |   |  |   |   |
|   | X |  |   |  |   |   |
|   |   |  |   |  | X |   |
|   |   |  |   |  | X |   |
|   | X |  |   |  |   |   |
|   | X |  |   |  |   |   |
|   |   |  |   |  |   |   |
|   | X |  |   |  |   |   |
|   |   |  |   |  |   |   |
|   | X |  |   |  |   |   |
|   |   |  |   |  |   |   |
|   |   |  |   |  |   |   |
|   |   |  |   |  |   |   |
|   |   |  |   |  |   |   |
|   |   |  |   |  |   |   |
|   | X |  |   |  |   |   |
|   |   |  |   |  |   |   |
|   |   |  |   |  |   |   |
|   |   |  |   |  |   |   |
|   |   |  |   |  |   |   |
|   | X |  | X |  |   | X |
|   | X |  |   |  | X | X |
|   |   |  |   |  |   |   |
|   |   |  |   |  |   |   |
|   |   |  |   |  |   |   |
|   | X |  |   |  |   |   |
|   | X |  |   |  |   |   |
|   |   |  |   |  |   |   |
|   | X |  |   |  |   |   |
|   | X |  |   |  |   |   |
|   |   |  |   |  |   |   |
|   |   |  |   |  |   |   |
|   | X |  |   |  |   |   |
|   |   |  |   |  |   |   |
| X |   |  |   |  |   |   |
| X | X |  |   |  |   |   |
| X |   |  |   |  |   |   |
|   | X |  |   |  |   |   |
|   | X |  |   |  |   |   |



|   |   |  |   |  |   |   |
|---|---|--|---|--|---|---|
|   |   |  |   |  |   |   |
|   |   |  |   |  |   |   |
|   | X |  |   |  |   |   |
|   | X |  |   |  |   |   |
| X | X |  |   |  | X |   |
| X | X |  |   |  | X |   |
|   | X |  |   |  |   |   |
|   |   |  |   |  |   |   |
|   | X |  | X |  |   | X |
|   |   |  |   |  | X |   |
|   |   |  |   |  |   |   |
|   |   |  |   |  |   |   |
|   | X |  |   |  |   |   |
|   |   |  |   |  |   |   |
|   |   |  |   |  |   |   |
|   |   |  |   |  |   |   |
|   |   |  |   |  |   |   |
|   |   |  |   |  |   |   |
|   |   |  |   |  |   |   |
|   |   |  |   |  |   |   |
| X | X |  |   |  |   |   |
|   |   |  |   |  |   |   |
| X | X |  |   |  |   | X |
|   |   |  |   |  |   |   |
|   |   |  |   |  |   |   |
|   |   |  |   |  |   |   |
|   |   |  |   |  |   |   |
|   |   |  |   |  |   |   |
|   |   |  |   |  |   |   |
|   |   |  |   |  |   |   |
| X | X |  |   |  | X | X |
|   | X |  |   |  |   |   |
|   |   |  |   |  |   |   |
|   |   |  |   |  |   |   |
|   |   |  |   |  |   |   |
|   | X |  |   |  | X |   |
|   | X |  |   |  | X |   |
|   |   |  |   |  |   |   |
|   |   |  |   |  |   |   |
| X | X |  |   |  |   | X |
|   |   |  |   |  |   |   |
|   | X |  |   |  |   |   |
|   |   |  |   |  |   |   |
|   | X |  |   |  |   |   |
|   |   |  |   |  |   |   |
|   | X |  |   |  |   |   |
| X | X |  |   |  |   |   |

|   |   |  |  |   |   |   |
|---|---|--|--|---|---|---|
|   |   |  |  |   |   |   |
|   | X |  |  |   |   |   |
|   |   |  |  |   |   |   |
|   |   |  |  |   |   |   |
|   |   |  |  |   |   |   |
|   | X |  |  |   |   |   |
|   |   |  |  |   |   |   |
|   | X |  |  |   | X | X |
|   | X |  |  |   |   | X |
|   | X |  |  |   |   |   |
|   | X |  |  |   |   |   |
| X | X |  |  |   |   |   |
| X | X |  |  |   |   | X |
|   |   |  |  |   |   |   |
| X | X |  |  |   |   |   |
|   | X |  |  |   |   | X |
|   | X |  |  |   |   |   |
|   | X |  |  |   |   |   |
|   | X |  |  |   |   |   |
|   | X |  |  |   |   |   |
|   | X |  |  | X | X | X |
| X | X |  |  |   | X | X |
|   | X |  |  |   | X |   |
|   | X |  |  |   |   |   |
|   | X |  |  |   |   |   |
|   | X |  |  |   |   |   |
|   | X |  |  |   |   |   |
|   | X |  |  |   | X | X |
|   |   |  |  |   |   |   |
|   |   |  |  |   |   | X |
|   |   |  |  |   |   |   |
|   | X |  |  |   |   |   |
| X | X |  |  |   |   | X |
|   |   |  |  |   |   |   |
|   | X |  |  |   |   |   |
|   | X |  |  |   |   |   |
|   | X |  |  |   |   |   |
|   |   |  |  |   |   | X |
|   | X |  |  |   |   |   |
| X |   |  |  |   |   |   |
|   | X |  |  |   |   |   |
| X |   |  |  |   |   |   |
|   |   |  |  |   |   |   |
|   |   |  |  |   |   |   |
| X | X |  |  |   |   |   |
| X |   |  |  |   |   |   |
| X | X |  |  |   |   | X |
| X | X |  |  |   |   | X |
|   |   |  |  |   |   |   |
|   | X |  |  |   |   |   |

|   |   |  |  |  |   |   |
|---|---|--|--|--|---|---|
| X | X |  |  |  |   |   |
|   |   |  |  |  |   |   |
| X | X |  |  |  |   | X |
|   |   |  |  |  |   |   |
|   |   |  |  |  |   |   |
|   |   |  |  |  |   |   |
| X | X |  |  |  |   | X |
| X | X |  |  |  |   | X |
| X | X |  |  |  |   | X |
| X | X |  |  |  |   |   |
|   | X |  |  |  |   |   |
|   | X |  |  |  |   |   |
| X | X |  |  |  |   |   |
| X | X |  |  |  |   |   |
|   |   |  |  |  |   |   |
|   |   |  |  |  |   |   |
| X | X |  |  |  |   |   |
|   |   |  |  |  |   |   |
| X | X |  |  |  |   | X |
|   |   |  |  |  |   | X |
|   |   |  |  |  |   |   |
|   | X |  |  |  |   |   |
|   |   |  |  |  | X |   |
|   | X |  |  |  |   |   |
|   | X |  |  |  |   | X |
|   |   |  |  |  |   |   |
| X | X |  |  |  |   |   |
|   |   |  |  |  |   |   |
|   | X |  |  |  |   |   |
|   | X |  |  |  |   |   |
| X | X |  |  |  |   |   |
|   |   |  |  |  |   |   |
|   |   |  |  |  |   |   |
|   | X |  |  |  |   |   |
| X | X |  |  |  |   | X |
|   | X |  |  |  |   |   |
|   | X |  |  |  |   |   |
|   |   |  |  |  |   |   |
| X | X |  |  |  |   | X |
|   |   |  |  |  |   |   |
|   |   |  |  |  |   |   |
| X | X |  |  |  |   |   |
|   |   |  |  |  |   |   |
|   | X |  |  |  |   |   |
|   |   |  |  |  |   |   |

|   |   |  |  |  |   |   |
|---|---|--|--|--|---|---|
|   | X |  |  |  |   |   |
|   | X |  |  |  |   |   |
|   |   |  |  |  |   |   |
|   |   |  |  |  |   |   |
|   |   |  |  |  |   | X |
| X | X |  |  |  |   | X |
|   | X |  |  |  |   |   |
|   | X |  |  |  |   |   |
|   |   |  |  |  |   |   |
| X |   |  |  |  |   |   |
|   | X |  |  |  |   |   |
|   |   |  |  |  |   |   |
| X | X |  |  |  |   | X |
|   |   |  |  |  |   |   |
| X |   |  |  |  |   |   |
|   | X |  |  |  |   |   |
|   | X |  |  |  |   |   |
| X | X |  |  |  |   |   |
|   |   |  |  |  |   |   |
|   |   |  |  |  |   |   |
|   |   |  |  |  |   | X |
| X | X |  |  |  |   |   |
|   | X |  |  |  |   |   |
|   |   |  |  |  |   |   |
|   |   |  |  |  |   |   |
|   | X |  |  |  | X |   |
|   | X |  |  |  |   |   |
|   | X |  |  |  |   |   |
|   | X |  |  |  |   | X |
| X | X |  |  |  |   |   |
| X | X |  |  |  |   | X |
|   |   |  |  |  |   |   |
|   | X |  |  |  |   | X |
|   | X |  |  |  |   |   |
|   | X |  |  |  | X |   |
| X | X |  |  |  | X | X |
|   |   |  |  |  |   |   |
|   | X |  |  |  |   |   |
|   | X |  |  |  |   |   |
|   | X |  |  |  |   |   |
| X | X |  |  |  |   | X |
|   |   |  |  |  |   |   |
| X | X |  |  |  |   | X |
|   |   |  |  |  |   |   |
|   | X |  |  |  |   | X |
|   |   |  |  |  |   |   |

|   |   |  |   |  |   |   |
|---|---|--|---|--|---|---|
|   |   |  |   |  |   |   |
|   |   |  |   |  |   |   |
|   | X |  |   |  |   |   |
|   |   |  |   |  |   |   |
| X | X |  |   |  |   | X |
| X | X |  |   |  | X |   |
|   | X |  |   |  |   |   |
|   |   |  |   |  |   |   |
|   | X |  |   |  |   |   |
|   |   |  |   |  |   |   |
|   |   |  |   |  |   |   |
| X | X |  |   |  |   |   |
| X | X |  |   |  |   |   |
|   |   |  |   |  |   |   |
| X | X |  |   |  |   | X |
| X | X |  |   |  |   |   |
|   |   |  | X |  | X | X |
|   |   |  |   |  |   |   |
|   |   |  |   |  |   |   |
|   |   |  |   |  |   |   |
|   | X |  |   |  |   |   |
|   |   |  |   |  |   |   |
|   |   |  |   |  |   |   |
|   |   |  |   |  |   |   |
| X | X |  |   |  |   | X |
| X | X |  |   |  |   |   |
|   |   |  |   |  |   |   |
|   |   |  |   |  |   |   |
|   |   |  |   |  |   |   |
| X | X |  |   |  |   |   |
|   | X |  |   |  |   |   |
|   |   |  |   |  |   |   |
|   |   |  |   |  |   |   |
|   | X |  |   |  |   |   |
|   |   |  |   |  |   |   |
|   | X |  |   |  |   |   |
|   | X |  |   |  |   |   |
|   |   |  |   |  |   | X |
| X | X |  |   |  |   |   |
|   | X |  |   |  |   |   |
|   | X |  |   |  |   |   |
| X |   |  |   |  |   | X |
|   |   |  |   |  |   |   |

|   |   |  |  |  |   |   |
|---|---|--|--|--|---|---|
| X | X |  |  |  |   |   |
| X | X |  |  |  |   |   |
|   |   |  |  |  |   |   |
|   |   |  |  |  |   |   |
| X | X |  |  |  |   |   |
|   | X |  |  |  |   |   |
| X |   |  |  |  |   |   |
|   | X |  |  |  |   |   |
| X | X |  |  |  |   |   |
|   |   |  |  |  |   |   |
|   | X |  |  |  |   | X |
|   | X |  |  |  |   |   |
|   | X |  |  |  |   |   |
| X |   |  |  |  |   |   |
|   |   |  |  |  | X |   |
| X | X |  |  |  |   |   |
|   | X |  |  |  |   |   |
|   | X |  |  |  |   |   |
|   | X |  |  |  |   | X |

| [47]                       | [48]          | [49]            | [23]      | [50]                                 | [51]                                 | [52]             |
|----------------------------|---------------|-----------------|-----------|--------------------------------------|--------------------------------------|------------------|
| 9                          | 10            | 11              | 12        | 13                                   | 14                                   | 15               |
| 28°37'-28°41'              | 29°03'-29°05' | 29°19'-29°24'   | 29°18'    | 29°25'-30°05'                        | 29°25'-30°05'                        | 28°37'-28°38'    |
| 48°20'-48°23'              | 48°28'-48°30' | 47°49'-48°55'   | 48°26'    | 47°50'-48°35'                        | 47°50'-48°35'                        | 48°23'-48°24'    |
| <7                         | <5            | <8              | n.a.      | 1-27                                 | 1-27                                 | 1-4              |
| total                      | total         | total           | total     | total                                | total                                | total and living |
| 102                        | 39            | 24              | 1         | 39                                   | 40                                   | 21               |
| >60 μm                     | >60 μm        | >63 μm          | >60 μm    | >63 μm                               | >125 μm                              | >63 μm           |
| SC                         | SI            | KB              | NI        | NI                                   | NI                                   | SC               |
| Al-Khiran, Southern coasts | Kubbar Island | Sulaibikhat Bay | Kazma Bay | Bubiyian Island, Shatt Al-Arab Delta | Bubiyian Island, Shatt Al-Arab Delta | Khor Iskander    |
| X                          | X             | X               | X         |                                      | X                                    |                  |
|                            |               |                 |           |                                      |                                      |                  |
|                            |               |                 |           |                                      |                                      |                  |
|                            |               |                 |           |                                      |                                      |                  |
|                            |               |                 |           |                                      |                                      |                  |
|                            |               |                 |           |                                      |                                      |                  |
|                            |               |                 |           |                                      |                                      |                  |
|                            |               |                 |           |                                      |                                      |                  |
|                            |               |                 |           |                                      |                                      |                  |
|                            |               |                 |           |                                      |                                      |                  |
|                            |               |                 |           |                                      |                                      |                  |
|                            | X             |                 |           | X                                    | X                                    |                  |
|                            |               |                 |           |                                      |                                      |                  |
|                            |               |                 |           |                                      |                                      |                  |
|                            |               |                 |           |                                      |                                      |                  |
|                            |               |                 |           |                                      |                                      |                  |
|                            |               |                 |           |                                      | X                                    |                  |
|                            |               |                 |           |                                      |                                      |                  |
|                            |               |                 |           |                                      |                                      |                  |
|                            | X             |                 |           |                                      | X                                    |                  |
|                            |               |                 |           |                                      |                                      |                  |
|                            |               |                 |           |                                      |                                      |                  |

|   |   |   |   |   |   |   |
|---|---|---|---|---|---|---|
|   |   |   |   |   |   |   |
|   | X |   |   |   |   |   |
|   | X |   |   |   | X | X |
|   |   |   |   |   |   |   |
|   | X |   |   |   | X |   |
|   |   |   |   |   |   |   |
|   |   |   |   |   |   |   |
|   |   |   |   |   |   |   |
|   |   |   |   |   |   |   |
|   |   |   |   |   |   |   |
|   |   |   |   |   |   |   |
|   |   |   |   |   |   |   |
|   |   |   |   |   |   |   |
|   |   |   | X |   |   |   |
|   |   | X |   |   | X |   |
|   |   |   |   |   |   |   |
|   |   |   | X |   | X |   |
|   |   | X |   |   |   |   |
|   | X |   | X |   |   |   |
|   |   |   |   |   |   |   |
|   |   |   |   |   |   |   |
|   |   |   |   |   |   |   |
|   |   |   |   |   |   |   |
|   | X | X |   |   |   | X |
|   |   |   |   |   |   |   |
|   |   |   |   |   |   |   |
| X | X |   |   |   |   | X |
|   | X |   |   |   |   |   |
| X |   |   |   |   | X |   |
| X | X | X |   | X | X | X |
|   |   |   |   |   |   |   |
| X |   | X | X |   | X |   |
| X |   |   | X |   |   |   |
|   |   |   |   |   |   |   |
|   |   |   |   |   |   |   |
|   |   |   |   |   |   |   |
|   | X |   |   |   |   |   |
|   |   |   |   |   |   |   |
|   | X |   |   |   |   | X |
|   |   |   |   |   |   |   |
|   |   |   |   |   |   |   |
|   |   | X |   |   |   |   |
|   |   |   |   |   |   |   |
|   |   |   |   |   |   |   |
|   | X | X | X |   |   | X |



|   |   |   |   |   |   |   |
|---|---|---|---|---|---|---|
|   |   | X |   |   |   |   |
|   |   |   |   |   |   | X |
|   |   |   | X | X | X |   |
|   |   |   |   |   |   |   |
|   |   |   |   |   |   |   |
|   | X |   | X |   |   |   |
|   |   |   |   |   |   |   |
|   |   |   |   |   |   |   |
|   |   |   | X |   |   |   |
| X |   |   | X |   |   |   |
|   |   |   |   |   |   |   |
|   |   |   |   |   | X |   |
|   |   | X |   |   |   |   |
|   |   |   |   |   |   |   |
|   | X |   |   | X |   |   |
|   |   |   |   |   |   |   |
|   |   |   |   |   |   |   |
|   |   |   |   |   |   |   |
|   |   |   |   |   |   |   |
|   |   |   |   |   |   |   |
|   |   |   | X |   | X | X |
|   | X |   | X | X | X | X |
|   |   |   | X |   |   |   |
|   |   |   |   |   | X | X |
|   |   |   |   |   |   |   |
|   |   |   | X |   |   |   |
|   |   |   |   |   |   |   |
| X | X |   | X |   | X |   |
|   | X | X | X | X | X |   |
| X |   | X | X |   | X |   |
|   |   |   |   |   |   |   |
| X |   |   |   |   |   |   |
| X | X |   |   | X | X | X |
|   |   |   |   |   |   |   |
|   |   |   |   |   |   |   |
| X | X |   |   |   | X | X |
| X |   | X |   |   |   |   |
|   |   |   |   |   |   |   |
|   |   |   |   |   |   |   |
|   | X |   |   |   |   |   |
|   |   |   |   |   |   |   |
|   |   |   | X | X | X | X |
|   |   |   |   |   |   |   |
|   |   |   |   |   |   |   |
|   |   |   |   |   |   |   |
|   |   |   |   |   |   |   |

|   |   |   |   |   |   |   |
|---|---|---|---|---|---|---|
| X | X | X |   | X | X | X |
|   |   |   |   |   |   |   |
|   | X | X | X | X | X | X |
|   |   | X |   | X | X | X |
|   |   |   |   |   |   |   |
| X |   |   |   |   |   |   |
|   |   | X |   |   |   |   |
|   |   |   |   |   |   |   |
|   | X |   |   |   |   | X |
|   |   |   |   |   |   | X |
|   |   |   |   |   |   |   |
|   |   |   |   |   |   |   |
|   |   |   |   |   |   |   |
|   |   |   |   |   |   |   |
|   |   |   |   |   |   |   |
|   |   |   |   |   |   |   |
|   |   |   |   |   |   |   |
|   |   |   |   |   |   |   |
|   |   |   |   |   | X |   |
|   |   |   |   |   |   |   |
|   |   |   |   |   |   |   |
|   |   |   |   |   |   |   |
|   |   |   |   |   |   |   |
|   |   |   |   |   |   |   |
|   |   |   |   |   |   |   |
|   |   |   |   |   |   |   |
|   |   |   |   |   |   |   |
|   |   |   |   |   |   |   |
|   |   |   |   |   |   |   |
|   |   |   |   |   |   |   |
|   |   |   |   |   |   |   |
|   |   |   |   |   |   |   |
|   |   |   |   |   |   |   |
| X |   |   |   |   |   | X |
| X | X |   |   | X |   |   |
|   |   |   |   |   |   |   |
| X |   |   |   |   |   |   |
|   |   |   |   |   |   |   |
|   | X |   |   | X | X | X |
|   |   |   |   |   |   |   |
|   |   |   |   |   | X |   |
| X | X |   |   |   |   |   |
|   | X |   |   |   | X |   |
|   |   |   |   |   |   |   |
|   | X |   |   |   | X | X |
|   |   |   |   |   |   |   |
|   |   |   |   |   |   |   |
|   |   |   |   | X | X |   |
|   | X |   |   |   |   |   |
|   |   |   |   |   |   |   |

|   |   |   |   |   |   |   |
|---|---|---|---|---|---|---|
|   | X | X |   |   | X | X |
| X | X | X | X | X |   | X |
|   |   |   |   |   |   |   |
|   |   |   |   |   |   |   |
|   | X |   |   |   | X | X |
|   | X | X | X | X | X |   |
|   |   |   | X |   |   |   |
|   |   |   |   |   |   |   |
|   |   |   |   |   |   |   |
|   |   |   |   |   |   |   |
|   |   |   |   |   |   |   |
|   |   |   |   |   |   |   |
|   |   |   |   |   |   |   |
|   |   |   |   |   |   |   |
|   |   |   |   |   |   |   |
| X | X |   | X | X |   | X |
| X | X |   | X |   | X |   |
|   |   |   |   |   |   |   |
|   |   |   |   |   |   |   |
|   |   |   | X |   |   |   |
| X |   |   |   |   |   |   |
|   |   |   |   |   |   |   |
|   |   |   |   |   |   |   |
|   | X |   |   |   |   |   |
|   |   |   |   |   |   |   |
|   |   |   |   | X |   |   |
|   |   |   |   |   |   |   |
|   | X |   | X | X | X |   |
|   |   |   |   |   |   |   |
|   | X |   |   |   |   |   |
|   |   |   |   |   |   |   |
|   |   |   |   |   |   |   |
|   | X |   |   |   |   | X |
|   |   |   |   |   |   |   |
|   |   |   |   |   |   |   |
| X |   |   | X |   | X |   |
|   |   |   |   |   |   |   |
|   |   |   |   |   |   |   |
|   |   |   |   |   |   | X |
|   |   |   |   |   |   |   |
|   | X | X |   | X | X |   |
| X | X | X |   | X | X |   |
|   | X |   |   |   | X |   |
|   |   |   |   |   |   |   |
|   | X |   |   | X | X | X |
|   |   |   |   |   |   |   |
|   | X |   |   |   |   |   |
|   |   |   |   |   |   |   |
|   | X |   |   |   | X | X |

[illegible]

|   |   |   |   |   |   |   |
|---|---|---|---|---|---|---|
|   |   |   |   |   |   |   |
|   |   |   |   |   |   |   |
|   |   |   |   |   |   |   |
|   |   |   |   |   |   |   |
|   | X | X |   | X |   |   |
|   |   |   |   |   |   |   |
|   |   |   |   |   |   |   |
|   |   |   |   |   |   |   |
|   |   |   |   |   |   |   |
|   | X |   |   |   |   |   |
|   |   |   | X |   |   |   |
|   |   |   |   |   |   |   |
|   |   |   |   |   |   |   |
|   |   |   |   |   |   |   |
|   |   |   |   |   |   |   |
|   |   |   |   |   |   |   |
|   |   |   |   |   |   |   |
|   |   |   |   |   |   |   |
|   |   |   |   |   |   |   |
|   | X |   |   |   |   |   |
|   |   |   |   |   |   |   |
|   |   |   |   |   |   |   |
|   |   |   |   |   |   |   |
|   |   |   |   |   |   |   |
|   |   |   |   |   |   |   |
|   |   |   |   |   |   |   |
|   |   |   |   |   |   |   |
|   |   |   |   |   |   |   |
|   |   |   |   |   |   |   |
|   |   |   |   |   |   |   |
|   |   |   | X | X |   |   |
|   |   |   |   |   |   |   |
|   |   |   |   |   |   |   |
|   |   |   |   |   |   |   |
|   |   |   |   |   |   |   |
|   |   |   |   |   |   |   |
|   |   |   |   |   |   |   |
|   |   |   |   |   |   |   |
|   |   |   |   |   |   |   |
| X | X | X |   | X | X | X |
|   |   | X |   |   |   |   |
|   |   |   |   |   |   |   |
|   |   |   |   |   |   |   |

[illegible]

|   |   |   |   |   |   |   |
|---|---|---|---|---|---|---|
|   | X |   |   |   |   |   |
|   |   |   |   |   |   |   |
|   |   |   |   |   |   |   |
|   | X |   |   | X | X | X |
| X | X |   | X |   | X | X |
| X |   |   | X |   |   |   |
| X | X | X | X | X | X | X |
|   |   |   |   |   |   |   |
|   |   |   |   |   |   |   |
| X | X | X | X |   | X |   |
|   |   |   |   |   |   |   |
| X |   | X | X |   | X | X |
|   |   | X |   | X |   | X |
|   |   |   |   |   |   |   |
|   |   | X |   |   |   | X |
|   |   |   |   |   |   |   |
| X | X |   | X | X | X | X |
| X | X | X | X | X | X | X |
|   | X |   |   |   |   | X |
|   |   |   |   | X |   |   |
|   |   |   |   |   |   |   |
|   |   |   |   |   |   |   |
| X |   |   |   |   |   |   |
| X | X | X | X | X | X |   |
|   |   |   |   |   |   |   |
|   |   |   |   |   |   |   |
|   | X | X |   | X | X |   |
|   |   |   |   |   |   |   |
|   | X |   |   |   | X |   |
|   |   |   |   |   |   |   |
|   |   |   |   |   |   |   |
|   |   |   |   |   |   |   |
|   |   |   |   |   |   |   |
|   |   |   |   |   |   |   |
|   |   |   |   |   |   |   |
|   |   |   |   |   |   |   |
|   |   |   |   |   |   |   |
|   |   |   |   |   |   |   |
|   |   |   |   |   |   |   |
|   |   |   |   |   |   |   |
|   |   |   |   |   |   |   |
|   |   |   |   | X |   |   |
|   |   |   |   |   |   |   |
|   |   |   |   |   |   |   |
|   | X |   |   |   |   |   |
|   |   |   |   |   |   |   |
|   |   |   |   |   |   |   |
|   |   |   | X |   |   |   |
|   |   |   |   |   |   |   |
|   |   |   |   |   |   |   |

|  |   |   |  |   |  |  |
|--|---|---|--|---|--|--|
|  |   |   |  |   |  |  |
|  |   |   |  |   |  |  |
|  | X | X |  |   |  |  |
|  | X |   |  |   |  |  |
|  |   |   |  |   |  |  |
|  |   |   |  |   |  |  |
|  |   |   |  |   |  |  |
|  |   |   |  |   |  |  |
|  |   |   |  |   |  |  |
|  |   |   |  |   |  |  |
|  |   |   |  |   |  |  |
|  |   |   |  |   |  |  |
|  |   |   |  |   |  |  |
|  |   |   |  |   |  |  |
|  |   |   |  |   |  |  |
|  |   |   |  |   |  |  |
|  |   |   |  | X |  |  |
|  |   |   |  |   |  |  |
|  |   |   |  |   |  |  |
|  |   |   |  |   |  |  |
|  |   |   |  |   |  |  |



| [53]                 | [29]             | [54]             | [55]             | [55]             | [56]                        |
|----------------------|------------------|------------------|------------------|------------------|-----------------------------|
| 16                   | 17               | 18               | 19a              | 19b              | 20                          |
| 29°20'-29°21'        | 29°19'-29°23'    | 28°48'-28°49'    | 29°29'-29°31'    | 28°41'-28°42'    | 29°01'-29°08'               |
| 47°53'-47°54'        | 47°49'-48°55'    | 48°46'-48°47'    | 48°06'-48°08'    | 48°22'-48°23'    | 48°08'-48°14'               |
| <2                   | < 10             | <20              | 1-7              | 0-2              | 1-9                         |
| total and living     | total and living | total and living | total and living | total and living | total                       |
| 30                   | 24               | 39               | 11               | 10               | 35                          |
| >63 µm               | >63 µm           | >63 µm           | >63 µm           | >63 µm           | >63 µm                      |
| KB                   | KB               | SI               | NC               | SC               | TF                          |
| East Sulaibikhat Bay | Sulaibikhat Bay  | Qaruh Island     | Ras Al-Subiya    | Ras Al-Zour      | Mina Ahmadi & Mina Abdullah |
| X                    | X                |                  | X                |                  |                             |
|                      |                  |                  |                  |                  |                             |
|                      |                  |                  |                  |                  |                             |
|                      |                  |                  |                  |                  |                             |
|                      |                  |                  |                  |                  |                             |
|                      |                  |                  |                  |                  |                             |
|                      |                  |                  |                  |                  |                             |
|                      |                  |                  |                  |                  |                             |
|                      |                  |                  |                  |                  |                             |
|                      |                  |                  |                  |                  |                             |
|                      |                  |                  |                  |                  |                             |
|                      |                  |                  |                  |                  |                             |
|                      |                  |                  |                  |                  |                             |
| X                    |                  | X                |                  |                  | X                           |
|                      |                  |                  |                  |                  |                             |
|                      |                  |                  |                  |                  |                             |
|                      |                  |                  |                  |                  |                             |
|                      |                  |                  |                  |                  |                             |
|                      |                  |                  |                  |                  |                             |
|                      |                  |                  |                  |                  | X                           |
|                      |                  |                  |                  |                  |                             |
|                      |                  |                  |                  |                  |                             |
|                      |                  | X                |                  |                  |                             |
|                      |                  |                  |                  |                  |                             |
|                      |                  |                  |                  |                  |                             |

|   |   |   |  |   |   |
|---|---|---|--|---|---|
|   |   |   |  |   |   |
|   |   | X |  |   | X |
|   |   | X |  |   |   |
|   |   |   |  |   |   |
| X |   | X |  |   |   |
|   |   |   |  |   |   |
|   |   |   |  |   |   |
|   |   |   |  |   |   |
|   |   |   |  |   |   |
|   |   |   |  |   |   |
|   |   |   |  |   |   |
|   |   |   |  |   |   |
|   |   |   |  |   |   |
|   |   |   |  |   |   |
|   |   |   |  |   |   |
|   |   |   |  |   |   |
|   |   |   |  |   |   |
|   | X | X |  |   |   |
|   |   |   |  |   |   |
|   |   |   |  |   |   |
|   | X | X |  | X |   |
|   |   |   |  |   |   |
| X |   |   |  |   | X |
|   |   |   |  |   | X |
|   |   |   |  |   |   |
|   |   |   |  |   |   |
|   |   |   |  | X |   |
|   |   |   |  |   |   |
|   |   |   |  |   |   |
|   |   |   |  |   |   |
|   |   |   |  |   |   |
| X |   | X |  | X | X |
|   |   |   |  |   |   |
|   |   |   |  |   |   |
| X | X |   |  |   | X |
|   |   |   |  |   |   |
|   | X |   |  | X |   |
| X |   |   |  |   |   |
|   |   |   |  |   |   |
|   |   |   |  |   |   |
|   |   |   |  |   |   |
|   |   |   |  |   |   |
|   |   | X |  |   |   |
|   |   |   |  |   |   |
|   |   |   |  | X |   |
|   |   |   |  |   |   |
|   |   |   |  |   |   |
|   |   |   |  |   |   |
|   | X |   |  |   |   |
|   |   |   |  |   |   |
|   |   |   |  |   |   |
|   |   |   |  |   |   |
|   |   |   |  |   |   |

|   |   |   |   |   |   |
|---|---|---|---|---|---|
|   | X |   |   |   |   |
|   |   |   |   |   | X |
| X |   |   |   |   |   |
|   |   |   |   |   |   |
|   |   |   |   |   |   |
|   |   |   |   |   |   |
|   |   |   |   |   |   |
|   |   |   |   |   |   |
|   |   |   |   |   |   |
| X |   |   |   |   |   |
|   |   |   |   |   |   |
| X |   |   | X |   |   |
|   | X |   |   |   |   |
|   |   |   |   |   |   |
|   |   |   |   |   |   |
|   |   |   |   |   | X |
|   |   |   |   |   |   |
|   |   |   |   |   |   |
|   |   |   |   |   |   |
|   |   | X |   |   |   |
|   |   |   |   |   |   |
|   |   |   |   |   |   |
|   |   |   |   |   |   |
|   |   |   |   | X | X |
| X |   | X | X | X | X |
|   |   |   |   |   |   |
|   |   |   |   |   |   |
|   |   |   |   |   |   |
|   |   |   |   |   |   |
|   |   |   |   |   |   |
| X |   |   | X | X | X |
| X | X | X |   |   | X |
|   | X |   |   | X |   |
|   |   |   |   |   |   |
|   |   |   |   |   |   |
|   |   |   |   |   | X |
| X |   | X |   | X | X |
|   |   |   |   |   |   |
|   |   |   |   |   |   |
|   |   |   |   |   |   |
|   |   |   |   |   |   |
| X |   |   |   | X | X |
|   |   |   |   |   |   |
|   |   |   |   |   |   |
|   |   |   |   |   |   |
|   |   |   |   |   |   |

[illegible]

|   |   |   |   |   |   |
|---|---|---|---|---|---|
| X |   | X |   | X | X |
| X | X | X | X | X | X |
|   |   |   |   |   |   |
|   |   |   |   |   |   |
|   |   |   |   | X | X |
| X | X | X |   | X | X |
|   |   |   |   |   |   |
|   |   |   |   |   |   |
|   |   |   |   |   |   |
|   |   |   |   |   |   |
|   |   |   |   |   |   |
|   |   |   |   |   |   |
|   |   |   |   |   |   |
|   |   |   |   |   |   |
|   | X |   |   |   |   |
| X |   |   | X | X | X |
| X | X |   | X |   |   |
|   |   |   |   |   |   |
|   |   |   |   |   |   |
|   |   |   |   |   |   |
|   |   |   |   |   |   |
|   |   |   |   |   |   |
|   |   |   |   |   |   |
|   |   |   |   |   |   |
|   |   |   |   |   |   |
|   |   |   |   |   |   |
|   |   | X |   | X |   |
|   |   |   |   |   |   |
|   |   | X |   |   |   |
|   |   |   |   |   |   |
|   |   |   |   |   |   |
|   |   | X |   | X | X |
|   |   |   |   |   |   |
| X |   |   |   |   |   |
|   |   |   |   |   |   |
|   |   |   |   |   |   |
|   |   |   |   |   |   |
|   |   | X |   |   |   |
|   |   |   |   |   |   |
|   | X |   |   | X |   |
| X | X |   | X |   | X |
|   |   | X |   |   |   |
|   |   |   |   |   |   |
| X |   | X |   |   | X |
|   |   |   |   |   |   |
|   |   |   |   |   |   |
|   |   |   |   |   |   |
| X |   | X | X |   |   |

[illegible]

[illegible]

|   |   |   |   |   |   |
|---|---|---|---|---|---|
|   |   |   |   |   |   |
|   |   |   |   |   |   |
|   | X | X |   |   | X |
|   |   |   |   |   |   |
|   |   |   |   |   |   |
|   |   |   |   |   |   |
|   |   |   |   |   |   |
|   |   |   |   |   |   |
|   |   |   |   |   |   |
|   |   |   |   |   |   |
|   |   |   |   |   |   |
|   |   |   |   |   |   |
|   |   |   |   |   |   |
|   |   |   |   |   |   |
|   |   | X |   |   |   |
|   |   |   |   |   |   |
|   |   |   |   |   |   |
|   |   |   |   |   |   |
|   |   |   |   |   |   |
|   |   |   |   |   |   |
|   |   |   |   |   |   |
|   |   | X |   | X |   |
|   |   |   |   |   |   |
|   |   | X |   |   |   |
|   |   |   |   |   |   |
|   |   |   |   |   |   |
|   |   |   |   |   |   |
|   |   |   |   |   |   |
|   |   |   |   |   |   |
|   |   |   |   |   |   |
| X |   | X | X |   |   |
|   |   |   |   |   |   |
|   |   |   |   |   |   |
|   |   |   |   |   |   |
|   |   |   |   |   |   |
|   |   |   |   |   |   |
|   |   |   |   |   |   |
|   |   |   |   |   |   |
| X | X |   | X | X |   |
|   |   |   |   |   |   |
| X | X | X | X | X |   |
|   |   |   |   |   |   |
|   | X |   |   | X |   |
| X | X | X | X | X | X |
|   |   |   |   |   |   |
|   |   |   |   |   |   |
|   |   |   |   |   |   |
|   |   | X |   |   |   |
|   |   | X |   |   |   |
|   |   |   |   |   |   |
|   |   |   |   |   |   |



[illegible]

[illegible]

| [57]                    | [30]            | [58]                       | [28]             | [59]           | [60]          |
|-------------------------|-----------------|----------------------------|------------------|----------------|---------------|
| 21                      | 22              | 23                         | 24               | 25             | 26            |
| 29°21'                  | 29°19'-29°23'   | 28°30'-29°15'              | 28°41'-28°40'    | 29°20'-29°30'  | 29°18'-29°36' |
| 48°29'                  | 47°49'-48°55'   | 48°10'-48°50'              | 48°38'-48°39'    | 48°12'-48°27'  | 4°45'-48°15'  |
| 13                      | 1-4             | 5-26                       | 1-35             | 1.5-7          | 1-22          |
| total                   | living          | total                      | livind and total | living         | living        |
| 1                       | 20              | 17                         | 37               | 50             | 46            |
| n.a.                    | >63 µm          | >125 µm                    | >125 µm          | >125 µm        | >125 µm       |
| NI                      | KB              | SC                         | SI               | NI             | KB            |
| South of Failaka Island | Sulaibikhat Bay | Ras Julaiy and Ras Al-Zour | Umm Al-Maradim   | Failaka Island | Kuwait Bay    |
|                         | X               |                            | X                | X              | X             |
|                         |                 |                            |                  |                |               |
|                         |                 |                            |                  |                |               |
|                         |                 |                            |                  |                | X             |
|                         |                 |                            |                  |                |               |
|                         |                 |                            |                  |                |               |
|                         |                 |                            |                  |                | X             |
|                         |                 |                            |                  |                |               |
|                         |                 |                            |                  |                |               |
|                         |                 |                            |                  |                |               |
|                         |                 | X                          | X                | X              |               |
|                         |                 | X                          |                  |                | X             |
|                         |                 | X                          |                  |                |               |
|                         |                 |                            |                  |                |               |
|                         |                 |                            |                  |                |               |
|                         |                 |                            |                  |                |               |
|                         |                 |                            |                  |                |               |
|                         |                 | X                          |                  |                |               |
|                         |                 | X                          |                  |                |               |
|                         |                 |                            |                  | X              |               |
|                         |                 |                            |                  |                |               |
|                         |                 | X                          |                  |                |               |

|   |   |   |   |   |   |
|---|---|---|---|---|---|
|   |   |   |   |   |   |
|   |   |   | X |   |   |
|   | X | X | X |   |   |
|   |   |   |   |   |   |
|   |   |   |   |   |   |
|   |   |   |   |   |   |
|   |   |   |   |   |   |
| X |   | X |   |   |   |
|   |   |   |   |   |   |
|   |   |   |   |   |   |
|   |   |   |   |   | X |
|   |   |   |   |   |   |
|   |   |   |   |   |   |
|   |   |   |   |   |   |
|   |   |   |   |   |   |
|   |   |   |   | X |   |
|   | X |   |   | X |   |
|   |   | X |   |   |   |
|   |   |   |   | X |   |
|   | X |   | X | X |   |
|   | X |   | X | X |   |
|   | X |   | X | X |   |
|   |   |   | X | X |   |
|   | X |   | X |   |   |
|   |   |   | X |   | X |
|   |   | X | X |   |   |
|   |   |   |   |   |   |
|   |   |   | X |   |   |
|   |   | X |   |   |   |
|   |   | X |   |   |   |
|   | X |   | X | X | X |
|   |   |   |   | X |   |
|   |   |   |   |   |   |
|   | X |   | X | X | X |
|   |   |   |   |   |   |
|   |   | X |   |   | X |
|   |   |   |   |   |   |
|   |   |   |   |   |   |
|   |   |   |   |   |   |
|   | X | X | X | X | X |
|   |   |   |   |   |   |
|   |   | X |   |   | X |
|   |   |   |   |   |   |
|   |   |   | X |   |   |
|   |   |   | X |   |   |
|   |   |   | X | X |   |

|   |   |   |   |   |   |
|---|---|---|---|---|---|
|   |   |   |   |   |   |
|   | X | X | X |   |   |
|   |   | X |   |   |   |
|   |   |   |   |   |   |
|   |   |   |   |   |   |
|   |   |   | X |   |   |
|   |   |   | X |   |   |
|   |   | X |   |   |   |
|   |   |   |   |   |   |
|   |   |   |   |   |   |
|   |   |   |   |   | X |
|   |   |   |   |   | X |
|   |   |   |   | X |   |
|   |   | X |   |   |   |
|   |   |   |   |   | X |
|   | X |   |   |   |   |
|   |   |   | X |   | X |
|   |   | X |   |   |   |
|   |   |   |   |   |   |
|   |   |   |   |   |   |
|   |   |   |   |   |   |
|   |   |   |   |   |   |
|   | X | X | X | X | X |
|   | X | X | X | X | X |
|   | X |   |   |   |   |
|   | X |   | X | X | X |
|   |   |   |   |   | X |
|   |   |   |   |   |   |
|   | X |   |   |   |   |
|   |   |   |   | X | X |
|   |   | X |   | X | X |
|   |   | X | X | X |   |
|   |   |   |   |   |   |
| X |   |   |   |   |   |
|   |   | X | X |   |   |
|   | X | X | X | X | X |
|   |   |   |   |   | X |
|   |   |   |   |   |   |
|   |   |   |   | X | X |
|   |   |   |   | X |   |
|   |   | X |   |   |   |
|   |   |   |   |   |   |
|   |   |   |   | X |   |
|   |   |   |   |   |   |
|   | X |   |   | X | X |
|   |   | X |   |   |   |
|   |   | X | X |   |   |
|   |   |   |   |   |   |
|   |   |   |   |   |   |

|   |   |   |   |   |   |
|---|---|---|---|---|---|
|   |   |   |   | X | X |
|   | X |   |   |   |   |
|   |   | X |   |   |   |
|   |   | X |   | X |   |
|   | X | X | X | X | X |
|   |   | X |   |   |   |
|   |   |   |   |   |   |
|   |   |   |   | X |   |
|   |   | X |   |   |   |
|   | X |   | X | X |   |
| X |   | X | X |   | X |
|   |   |   | X |   |   |
|   |   |   |   |   |   |
|   |   |   |   |   |   |
|   |   |   |   |   |   |
|   |   | X |   |   |   |
|   |   |   | X |   |   |
|   |   |   |   |   |   |
|   |   |   |   | X |   |
|   |   |   |   |   |   |
|   |   | X |   |   |   |
|   |   | X |   |   |   |
|   |   | X |   |   |   |
|   |   | X |   |   |   |
|   |   | X |   |   |   |
|   |   | X |   |   |   |
|   |   | X |   |   |   |
|   | X | X | X |   | X |
|   |   |   |   |   |   |
|   |   |   |   |   |   |
|   | X |   | X | X |   |
|   |   | X |   |   |   |
|   |   |   |   |   |   |
|   |   |   |   |   |   |
|   |   |   |   |   |   |
|   |   |   |   |   |   |
|   |   |   |   |   |   |
|   | X |   |   | X |   |
|   |   |   |   |   |   |
|   |   |   |   | X |   |
|   |   |   |   |   |   |
|   |   |   |   | X |   |
|   |   |   |   |   |   |
|   |   |   |   |   |   |
|   |   |   | X | X |   |
|   |   |   |   | X |   |
|   |   |   |   |   |   |

|   |   |   |   |   |   |
|---|---|---|---|---|---|
|   |   |   | X | X |   |
|   | X |   |   | X | X |
|   |   |   |   |   |   |
|   |   | X |   |   |   |
|   | X | X | X | X |   |
|   | X | X | X | X |   |
|   |   |   |   |   |   |
|   |   | X |   |   | X |
| X |   | X | X |   | X |
|   |   | X |   |   |   |
|   |   | X |   |   |   |
|   |   |   | X |   |   |
|   |   |   |   |   |   |
|   | X |   | X |   |   |
|   | X |   | X | X |   |
|   |   |   |   | X |   |
|   |   |   |   | X |   |
|   |   |   | X |   |   |
|   |   |   |   |   |   |
|   |   |   |   |   |   |
|   |   | X |   |   |   |
|   |   |   |   |   |   |
|   |   |   |   |   |   |
|   |   |   |   |   |   |
|   |   | X |   |   |   |
|   |   |   | X | X |   |
|   |   | X | X |   |   |
|   |   |   |   |   |   |
|   |   | X |   |   |   |
|   |   | X | X |   |   |
|   |   |   | X |   |   |
|   |   |   |   |   |   |
|   |   |   |   |   |   |
|   |   |   | X | X |   |
|   |   |   |   | X |   |
|   |   | X |   |   |   |
|   | X |   | X |   |   |
|   |   | X | X |   |   |
|   | X |   | X | X | X |
|   | X | X |   | X | X |
| X |   |   |   | X |   |
|   |   |   |   |   |   |
|   | X | X | X | X | X |
|   |   |   |   |   |   |
|   |   |   |   | X |   |
|   |   |   |   |   |   |
|   | X | X | X | X |   |

[illegible]



|   |   |   |   |   |   |
|---|---|---|---|---|---|
|   |   |   |   |   |   |
| X |   |   |   |   |   |
|   |   |   |   |   |   |
| X |   |   |   |   |   |
|   |   |   |   |   | X |
|   |   | X |   |   | X |
|   |   |   |   |   |   |
|   | X | X |   |   |   |
|   |   |   |   |   |   |
|   |   |   |   |   |   |
|   |   |   |   |   |   |
|   |   | X |   |   |   |
|   |   |   |   |   |   |
|   |   |   |   |   |   |
|   |   |   | X |   |   |
|   |   |   | X |   |   |
|   | X | X |   |   |   |
|   |   | X |   |   |   |
|   |   | X |   |   |   |
|   |   |   |   |   |   |
|   |   | X |   |   |   |
|   |   |   |   |   |   |
|   |   |   |   |   |   |
|   |   |   |   |   |   |
|   |   | X |   |   | X |
|   |   |   |   |   |   |
|   |   |   |   |   |   |
|   |   |   |   |   |   |
|   |   |   |   |   |   |
|   |   |   |   |   |   |
|   |   | X |   |   |   |
|   |   |   |   |   |   |
|   |   |   |   |   |   |
|   |   | X |   |   |   |
| X |   |   |   |   |   |
|   |   | X |   |   |   |
|   |   |   |   |   |   |
|   |   |   |   |   | X |
|   |   |   |   | X |   |
|   |   |   |   |   | X |
|   | X |   | X | X |   |
|   |   | X | X |   |   |
|   |   | X |   |   |   |

|  |   |   |   |   |   |
|--|---|---|---|---|---|
|  |   | X |   |   |   |
|  |   |   |   |   |   |
|  | X |   | X | X |   |
|  |   | X |   |   | X |
|  |   |   |   |   |   |
|  |   |   |   |   |   |
|  |   |   |   |   |   |
|  |   |   |   |   |   |
|  |   |   |   |   |   |
|  |   |   |   |   |   |
|  |   | X |   |   | X |
|  |   | X |   |   |   |
|  |   |   |   |   |   |
|  |   |   |   |   |   |
|  |   |   |   |   |   |
|  |   | X |   |   |   |
|  |   |   |   |   |   |
|  |   |   |   |   |   |
|  |   |   | X | X |   |
|  | X |   |   |   |   |
|  | X |   |   |   |   |
|  |   |   |   |   |   |
|  |   |   |   |   |   |
|  |   | X |   |   |   |
|  |   |   |   |   |   |
|  |   |   | X | X | X |
|  |   |   |   |   |   |
|  |   | X |   |   |   |
|  |   |   |   |   |   |
|  |   |   |   | X |   |
|  | X | X | X | X |   |
|  |   | X |   |   |   |
|  |   |   |   |   |   |
|  |   | X |   |   | X |
|  |   | X |   |   |   |
|  |   |   | X |   |   |
|  |   | X |   |   |   |
|  |   |   |   |   | X |

|   |   |   |   |   |   |
|---|---|---|---|---|---|
|   |   |   |   |   |   |
|   |   | X | X |   |   |
|   |   |   |   |   |   |
|   |   |   | X | X |   |
|   |   | X | X | X | X |
|   |   |   |   |   |   |
|   | X |   | X | X | X |
|   |   | X |   |   | X |
|   |   |   |   |   |   |
|   |   |   |   | X |   |
|   |   | X |   |   | X |
|   |   |   |   |   | X |
| X | X |   |   | X |   |
|   | X |   |   | X |   |
|   |   |   |   |   |   |
|   |   |   |   |   |   |
|   |   |   |   |   |   |
|   | X |   |   | X |   |
|   | X | X | X | X | X |
|   | X |   |   | X |   |
|   |   |   |   |   |   |
|   |   | X | X |   | X |
|   |   | X |   |   | X |
|   |   |   | X |   | X |
|   |   |   | X | X |   |
|   |   |   |   |   |   |
|   |   | X |   |   |   |
|   |   |   |   |   |   |
|   |   |   |   |   |   |
|   |   |   |   |   |   |
|   |   | X | X |   |   |
|   |   | X |   |   |   |
|   |   |   |   |   |   |
|   |   | X |   |   |   |
|   |   |   |   |   |   |
|   |   | X | X |   |   |
|   |   |   | X |   |   |
|   |   |   |   |   |   |
|   |   |   |   |   |   |
|   |   |   |   | X | X |
|   |   |   |   |   |   |
|   |   | X |   |   |   |

|  |  |   |   |  |   |
|--|--|---|---|--|---|
|  |  |   |   |  |   |
|  |  |   |   |  |   |
|  |  |   | X |  |   |
|  |  |   |   |  |   |
|  |  |   |   |  |   |
|  |  |   |   |  |   |
|  |  |   |   |  |   |
|  |  |   |   |  |   |
|  |  |   |   |  |   |
|  |  |   |   |  |   |
|  |  |   |   |  |   |
|  |  | X |   |  |   |
|  |  |   |   |  |   |
|  |  |   |   |  |   |
|  |  |   |   |  |   |
|  |  |   |   |  | X |
|  |  |   |   |  |   |
|  |  |   |   |  |   |
|  |  |   |   |  |   |
|  |  |   |   |  |   |
